# Supplementary material
Source: PubMed Central journal article supplement (PMC9973425)
Supplement: crc-21-0018-s01.pdf [file crc-21-0018-s01.pdf]

**Supplemental Table 1**

| <b>Gene</b>  | <b>logFC<br/>EA/AA</b> | <b>adj.P.Val</b> |
|--------------|------------------------|------------------|
| CACNA2<br>D1 | -<br>1.616486248       | 2.73234E-<br>15  |
| RPS28        | -<br>1.583192857       | 7.98044E-<br>10  |
| AR           | -<br>1.490650597       | 2.38261E-<br>09  |
| CYP4Z1       | -<br>1.447292302       | 1.2563E-06       |
| IL6ST        | -1.39709581            | 5.56145E-<br>12  |
| GFRA1        | -<br>1.350601496       | 0.00012253       |
| KCND3        | -<br>1.319183545       | 2.55279E-<br>12  |
| AGTR1        | -<br>1.295185468       | 1.00719E-<br>07  |
| PRKG2        | -<br>1.247744271       | 1.00429E-<br>18  |
| ADAMTS1<br>5 | -<br>1.243349701       | 1.10456E-<br>09  |
| C7           | -1.2367314             | 9.23632E-<br>06  |
| IGSF9B       | -1.22560262            | 1.98458E-<br>11  |
| SLC7A2       | -<br>1.219174304       | 2.19199E-<br>08  |
| GPR81        | -<br>1.205194981       | 9.03106E-<br>08  |
| EDIL3        | -<br>1.196038236       | 2.67603E-<br>11  |
| CYP4B1       | -<br>1.191310314       | 1.0731E-06       |
| CLIC6        | -1.1889956             | 1.53997E-<br>07  |
| ERBB4        | -<br>1.185121909       | 1.38167E-<br>05  |
| TIMP4        | -<br>1.184578067       | 3.87282E-<br>08  |
| THRSP        | -<br>1.180747663       | 7.73563E-<br>06  |

|              |                  |                 |
|--------------|------------------|-----------------|
| NRK          | -<br>1.172764212 | 3.89521E-<br>10 |
| GABRB3       | -<br>1.146063066 | 1.83977E-<br>08 |
| FMO2         | -<br>1.131628919 | 2.03438E-<br>06 |
| OMD          | -<br>1.122322689 | 1.03144E-<br>06 |
| ARHGAP<br>20 | -<br>1.121317355 | 4.99001E-<br>16 |
| CYP2B7P<br>1 | -<br>1.118740042 | 0.00032552<br>6 |
| CDKL5        | -<br>1.114267352 | 3.01303E-<br>15 |
| CCNT1        | -<br>1.108688716 | 4.51526E-<br>20 |
| CNTN1        | -<br>1.106268555 | 8.30467E-<br>10 |
| PTPRT        | -<br>1.104947401 | 0.00043836      |
| SLC28A3      | -<br>1.097832524 | 3.16207E-<br>07 |
| RUNX1T1      | -<br>1.097034394 | 3.07801E-<br>12 |
| FAT3         | -<br>1.096850844 | 1.34563E-<br>11 |
| ZFPM2        | -<br>1.092742421 | 2.06064E-<br>14 |
| CHL1         | -1.09142626      | 1.49816E-<br>07 |
| RASEF        | -<br>1.086500505 | 2.37049E-<br>09 |
| NFATC2       | -<br>1.086065811 | 1.01759E-<br>12 |
| OGN          | -<br>1.082412447 | 1.42436E-<br>05 |
| KIAA0754     | -1.06592747      | 3.87592E-<br>14 |
| ADAMTS1<br>2 | -<br>1.045849428 | 3.13298E-<br>09 |
| KLHL4        | -1.03585655      | 1.98589E-<br>12 |
| PRKG1        | -<br>1.034774571 | 1.12459E-<br>10 |
| SLC44A5      | -<br>1.026319148 | 7.14098E-<br>08 |

|          |              |             |
|----------|--------------|-------------|
| DDR2     | -1.02610626  | 2.20563E-11 |
| KIRREL   | -1.025751468 | 1.71401E-11 |
| LRRC37A2 | -1.02131282  | 2.3834E-42  |
| TSHZ2    | -1.017308713 | 2.93245E-13 |
| COL10A1  | -1.014043685 | 0.00018806  |
| TNN      | -1.014001509 | 3.27188E-06 |
| AKAP2    | -1.004992219 | 3.01423E-10 |
| GRIK3    | -1.002663592 | 1.41135E-05 |
| FMO1     | -1.002428093 | 1.04516E-09 |
| GGT3P    | 1.002995458  | 5.209E-17   |
| KCNG1    | 1.012630355  | 3.03523E-08 |
| RNF112   | 1.015831752  | 1.4871E-25  |
| P2RY11   | 1.022090961  | 5.32665E-13 |
| GPC2     | 1.025637556  | 1.47321E-17 |
| MSLN     | 1.030129161  | 0.001066345 |
| INE2     | 1.038603464  | 4.36059E-12 |
| CCL3L1   | 1.038777254  | 4.62231E-18 |
| TSPAN10  | 1.044760145  | 2.40626E-24 |
| NACA2    | 1.053746115  | 1.67191E-30 |
| COL9A3   | 1.058009115  | 3.07866E-11 |
| MAGED4   | 1.061320144  | 6.47747E-14 |
| MFSD2B   | 1.065604315  | 3.40299E-19 |
| CAPS     | 1.097430224  | 8.36083E-17 |
| DLX5     | 1.10407257   | 2.02685E-   |

|        |             |             |
|--------|-------------|-------------|
|        |             | 10          |
| GJB5   | 1.1274652   | 7.11978E-09 |
| COL2A1 | 1.135461778 | 5.03194E-06 |
| TUBB8  | 1.173527118 | 1.83113E-35 |
| PCSK1N | 1.477253295 | 3.12726E-12 |
| TSIX   | 1.605997143 | 2.74797E-22 |

Gene: gene name

LogFC AA vs EA;  $\text{Log}_2 \left( \frac{\text{mean EA tumor RPKM}}{\text{mean AA tumor RPKM}} \right)$  for each transcript

adj.P.Val: P value adjusted for multiple hypothesis testing with BH method
