# Supplementary material
Source: PubMed Central journal article supplement (PMC9973425)
Supplement: crc-21-0018-s02.pdf [file crc-21-0018-s02.pdf]

**Supplemental Table 2**

| <b>Gene</b> | <b>logFC</b> | <b>adj.P.Val</b> | <b>Tumor</b> |
|-------------|--------------|------------------|--------------|
| GSTM1       | 3.54         | 1.07E-03         | CESC         |
| HBB         | 1.78         | 4.65E-02         | CESC         |
| GSTT2       | 1.22         | 4.65E-02         | CESC         |
| IHH         | 2.46         | 3.86E-02         | UCEC         |
| PDIA2       | 1.63         | 4.82E-02         | UCEC         |
| HSD17B3     | 1.51         | 6.23E-03         | UCEC         |
| GPR83       | 1.37         | 1.37E-02         | UCEC         |
| LRGUK       | 1.22         | 3.36E-02         | UCEC         |
| C3orf32     | 1.17         | 1.58E-02         | UCEC         |
| NOTCH2NL    | 1.14         | 2.54E-10         | UCEC         |
| LRRIQ3      | 1.03         | 4.64E-02         | UCEC         |
| DISP2       | -1.16        | 5.88E-03         | UCEC         |
| C21orf56    | -1.30        | 3.80E-02         | UCEC         |
| RPS28       | -2.49        | 8.28E-03         | UCEC         |
| ULK4        | 1.18         | 7.82E-08         | OV           |
| PLCH1       | 2.03         | 2.42E-07         | OV           |
| ACSM3       | 1.34         | 1.53E-05         | OV           |
| CEACAM21    | -2.03        | 1.53E-05         | OV           |
| CD300C      | -1.81        | 4.05E-05         | OV           |
| EFR3B       | 1.34         | 4.40E-05         | OV           |
| C1QC        | -1.51        | 4.93E-05         | OV           |
| SLC26A7     | 1.99         | 4.93E-05         | OV           |
| BSN         | 1.28         | 5.09E-05         | OV           |
| ARHGDIB     | -1.15        | 5.09E-05         | OV           |
| C1QB        | -1.55        | 7.39E-05         | OV           |
| TYROBP      | -1.41        | 9.70E-05         | OV           |
| C3orf15     | 1.20         | 1.03E-04         | OV           |
| FGFRL1      | 1.21         | 1.47E-04         | OV           |
| GPSM3       | -1.33        | 1.54E-04         | OV           |
| C1QA        | -1.45        | 1.71E-04         | OV           |
| TBX1        | 1.85         | 2.05E-04         | OV           |
| ZNF389      | 1.22         | 2.24E-04         | OV           |
| PDLIM2      | -1.02        | 2.60E-04         | OV           |
| GYPE        | -1.26        | 2.77E-04         | OV           |
| LAPTM5      | -1.31        | 2.90E-04         | OV           |
| TGFBI       | -1.23        | 3.84E-04         | OV           |
| HLA-DPA1    | -1.51        | 4.42E-04         | OV           |
| FILIP1      | 1.37         | 4.44E-04         | OV           |

|              |       |          |    |
|--------------|-------|----------|----|
| CRYBB1       | -1.38 | 5.03E-04 | OV |
| HNMT         | -1.10 | 5.03E-04 | OV |
| HS3ST1       | -1.21 | 5.03E-04 | OV |
| CD68         | -1.12 | 5.27E-04 | OV |
| MDH1B        | 1.01  | 5.27E-04 | OV |
| SRGN         | -1.15 | 5.59E-04 | OV |
| MSI1         | 1.57  | 5.73E-04 | OV |
| SIGLEC9      | -1.49 | 6.33E-04 | OV |
| SLCO2B1      | -1.42 | 6.33E-04 | OV |
| AIF1         | -1.52 | 6.34E-04 | OV |
| FCER1G       | -1.28 | 6.44E-04 | OV |
| C2orf39      | 2.04  | 6.91E-04 | OV |
| ZNF334       | 1.19  | 6.93E-04 | OV |
| ZNF443       | 1.04  | 6.93E-04 | OV |
| CRIP3        | 1.49  | 7.19E-04 | OV |
| DNAH7        | 1.25  | 7.19E-04 | OV |
| DNAH10       | 1.27  | 7.37E-04 | OV |
| SLC46A3      | -1.04 | 8.02E-04 | OV |
| HYDIN        | 1.13  | 8.52E-04 | OV |
| MAF          | -1.20 | 8.58E-04 | OV |
| DNAH6        | 1.45  | 8.87E-04 | OV |
| GLRX         | -1.00 | 8.87E-04 | OV |
| MS4A4A       | -1.50 | 8.90E-04 | OV |
| LOC100233209 | -1.69 | 9.43E-04 | OV |
| CD14         | -1.18 | 9.93E-04 | OV |
| C17orf60     | -1.56 | 1.00E-03 | OV |
| LRRC37A2     | -1.17 | 1.00E-03 | OV |
| GIMAP6       | -1.03 | 1.27E-03 | OV |
| ADORA3       | -1.52 | 1.29E-03 | OV |
| CYBB         | -1.51 | 1.35E-03 | OV |
| LSP1         | -1.15 | 1.35E-03 | OV |
| HAMP         | -1.81 | 1.35E-03 | OV |
| RNASE2       | -1.50 | 1.38E-03 | OV |
| CLEC18A      | 1.57  | 1.48E-03 | OV |
| NPL          | -1.03 | 1.49E-03 | OV |
| C1orf162     | -1.20 | 1.50E-03 | OV |
| RNASE6       | -1.41 | 1.53E-03 | OV |
| C20orf26     | 1.56  | 1.58E-03 | OV |
| LILRA2       | -1.45 | 1.58E-03 | OV |
| LRP4         | 1.44  | 1.58E-03 | OV |
| MS4A6A       | -1.50 | 1.58E-03 | OV |

|          |       |          |    |
|----------|-------|----------|----|
| RCSD1    | -1.05 | 1.58E-03 | OV |
| DCN      | -1.49 | 1.61E-03 | OV |
| TBXAS1   | -1.31 | 1.68E-03 | OV |
| LRRIQ3   | 1.03  | 1.71E-03 | OV |
| CACNB4   | 1.04  | 1.78E-03 | OV |
| CCDC74B  | 1.02  | 1.82E-03 | OV |
| MGC16121 | -1.59 | 1.82E-03 | OV |
| ADAP2    | -1.01 | 1.84E-03 | OV |
| GNG2     | -1.01 | 1.85E-03 | OV |
| HLA-DPB1 | -1.33 | 1.85E-03 | OV |
| GMFG     | -1.07 | 1.91E-03 | OV |
| APOBEC3H | -1.44 | 1.94E-03 | OV |
| DSCAML1  | 1.63  | 2.06E-03 | OV |
| GIMAP4   | -1.11 | 2.06E-03 | OV |
| MSR1     | -1.24 | 2.07E-03 | OV |
| FOLR2    | -1.25 | 2.07E-03 | OV |
| PIK3CG   | -1.39 | 2.07E-03 | OV |
| CD300A   | -1.19 | 2.12E-03 | OV |
| IRF8     | -1.44 | 2.12E-03 | OV |
| PDIA2    | 1.82  | 2.19E-03 | OV |
| APOC2    | -2.01 | 2.24E-03 | OV |
| C1S      | -1.18 | 2.24E-03 | OV |
| FCGR2A   | -1.14 | 2.24E-03 | OV |
| GAB3     | -1.12 | 2.24E-03 | OV |
| ABLIM3   | -1.11 | 2.24E-03 | OV |
| EFEMP1   | -1.89 | 2.28E-03 | OV |
| ITGB2    | -1.24 | 2.28E-03 | OV |
| DNAH11   | 1.60  | 2.39E-03 | OV |
| CD52     | -1.56 | 2.40E-03 | OV |
| LAIR1    | -1.36 | 2.57E-03 | OV |
| SELPLG   | -1.16 | 2.66E-03 | OV |
| S1PR4    | -1.20 | 2.72E-03 | OV |
| LY86     | -1.29 | 2.72E-03 | OV |
| MT2A     | -1.06 | 2.75E-03 | OV |
| HKDC1    | 1.23  | 2.75E-03 | OV |
| CRABP2   | -1.16 | 2.76E-03 | OV |
| RSPH10B2 | 1.35  | 2.77E-03 | OV |
| CSF1R    | -1.22 | 2.77E-03 | OV |
| VSIG4    | -1.43 | 2.81E-03 | OV |
| ALOX5AP  | -1.69 | 2.85E-03 | OV |
| SIGLEC7  | -1.18 | 2.87E-03 | OV |

|          |       |          |    |
|----------|-------|----------|----|
| PPARG    | -1.34 | 2.89E-03 | OV |
| HAVCR2   | -1.32 | 2.90E-03 | OV |
| HOPX     | -1.29 | 2.95E-03 | OV |
| RNF157   | 1.08  | 2.95E-03 | OV |
| GIMAP1   | -1.00 | 3.02E-03 | OV |
| TTLL9    | 1.19  | 3.03E-03 | OV |
| GPR34    | -1.39 | 3.07E-03 | OV |
| F13A1    | -1.52 | 3.10E-03 | OV |
| WDR65    | 1.46  | 3.29E-03 | OV |
| CLEC18B  | 1.53  | 3.32E-03 | OV |
| MS4A7    | -1.15 | 3.39E-03 | OV |
| TMEM176A | -1.54 | 3.59E-03 | OV |
| CMKLR1   | -1.17 | 3.66E-03 | OV |
| HLA-DMA  | -1.18 | 3.66E-03 | OV |
| HCST     | -1.06 | 3.73E-03 | OV |
| LRRC25   | -1.12 | 3.82E-03 | OV |
| LY96     | -1.22 | 3.87E-03 | OV |
| CTSW     | -1.90 | 3.93E-03 | OV |
| JAK3     | -1.01 | 3.93E-03 | OV |
| SIRPB2   | -1.44 | 3.93E-03 | OV |
| SLC38A3  | 1.34  | 3.93E-03 | OV |
| GAL3ST4  | -1.01 | 4.01E-03 | OV |
| GNG7     | -1.35 | 4.01E-03 | OV |
| CD300LF  | -1.41 | 4.04E-03 | OV |
| CXCL12   | -1.65 | 4.15E-03 | OV |
| CD163    | -1.34 | 4.20E-03 | OV |
| SIGLEC11 | -1.84 | 4.20E-03 | OV |
| TNFSF8   | -1.48 | 4.22E-03 | OV |
| FCGR3A   | -1.24 | 4.26E-03 | OV |
| PSTPIP1  | -1.20 | 4.42E-03 | OV |
| TUBB2B   | 2.14  | 4.42E-03 | OV |
| ARHGAP9  | -1.31 | 4.43E-03 | OV |
| FERMT3   | -1.09 | 4.48E-03 | OV |
| CD37     | -1.12 | 4.55E-03 | OV |
| CSF3R    | -1.54 | 4.55E-03 | OV |
| PRDM8    | -1.19 | 4.58E-03 | OV |
| CSF2RA   | -1.44 | 4.58E-03 | OV |
| KLRB1    | -2.02 | 4.58E-03 | OV |
| PIK3R5   | -1.05 | 4.64E-03 | OV |
| RASGRP4  | -1.19 | 4.64E-03 | OV |
| LST1     | -1.37 | 4.73E-03 | OV |

|          |       |          |    |
|----------|-------|----------|----|
| HIST1H4C | -1.12 | 4.91E-03 | OV |
| SPI1     | -1.07 | 4.91E-03 | OV |
| BTK      | -1.35 | 5.19E-03 | OV |
| WAS      | -1.03 | 5.20E-03 | OV |
| CYTH4    | -1.17 | 5.29E-03 | OV |
| CA14     | 1.10  | 5.38E-03 | OV |
| ABI3     | -1.05 | 5.39E-03 | OV |
| LYZ      | -1.56 | 5.39E-03 | OV |
| GIMAP7   | -1.02 | 5.47E-03 | OV |
| TLR4     | -1.07 | 5.49E-03 | OV |
| P2RY13   | -1.47 | 5.57E-03 | OV |
| DOCK8    | -1.12 | 5.62E-03 | OV |
| CD86     | -1.27 | 5.72E-03 | OV |
| LAT2     | -1.16 | 5.80E-03 | OV |
| VENTX    | -1.25 | 5.83E-03 | OV |
| SIGLEC5  | -1.29 | 5.86E-03 | OV |
| TMEM232  | 1.36  | 5.90E-03 | OV |
| HPGDS    | -1.27 | 5.93E-03 | OV |
| C17orf87 | -1.07 | 5.93E-03 | OV |
| KLK10    | -1.52 | 5.93E-03 | OV |
| SELM     | -1.28 | 5.93E-03 | OV |
| SPP1     | -1.05 | 5.93E-03 | OV |
| CD53     | -1.21 | 6.03E-03 | OV |
| CD7      | -1.62 | 6.07E-03 | OV |
| MRC1     | -1.38 | 6.19E-03 | OV |
| BIN2     | -1.24 | 6.24E-03 | OV |
| CD247    | -1.40 | 6.32E-03 | OV |
| PTPRCAP  | -1.22 | 6.38E-03 | OV |
| EVI2B    | -1.32 | 6.38E-03 | OV |
| C3AR1    | -1.29 | 6.41E-03 | OV |
| CLIC5    | -1.21 | 6.41E-03 | OV |
| DOK2     | -1.07 | 6.49E-03 | OV |
| KIAA0748 | -1.44 | 6.49E-03 | OV |
| SASH3    | -1.26 | 6.49E-03 | OV |
| RIPK3    | -1.05 | 6.54E-03 | OV |
| TREM2    | -1.33 | 6.88E-03 | OV |
| CASC1    | 1.20  | 7.12E-03 | OV |
| NCKAP1L  | -1.28 | 7.19E-03 | OV |
| ZNF727   | 1.35  | 7.19E-03 | OV |
| GPR77    | -1.09 | 7.24E-03 | OV |
| SLA      | -1.14 | 7.24E-03 | OV |

|           |       |          |    |
|-----------|-------|----------|----|
| NCF4      | -1.04 | 7.28E-03 | OV |
| VAV1      | -1.16 | 7.33E-03 | OV |
| DLEC1     | 1.22  | 7.52E-03 | OV |
| DPYD      | -1.33 | 7.52E-03 | OV |
| TNFAIP8L2 | -1.10 | 7.52E-03 | OV |
| TNFRSF11A | -1.15 | 7.52E-03 | OV |
| TLR8      | -1.50 | 7.62E-03 | OV |
| SALL1     | 1.68  | 7.65E-03 | OV |
| SLC9A9    | -1.04 | 7.65E-03 | OV |
| IL10RA    | -1.15 | 7.92E-03 | OV |
| PLEK      | -1.18 | 7.96E-03 | OV |
| NKX3-1    | -1.34 | 8.05E-03 | OV |
| FCGR1B    | -1.16 | 8.13E-03 | OV |
| WBSCR26   | -2.24 | 8.15E-03 | OV |
| C10orf128 | -1.23 | 8.27E-03 | OV |
| FCRLB     | -1.32 | 8.27E-03 | OV |
| FGL2      | -1.27 | 8.27E-03 | OV |
| TMEM200A  | -1.18 | 8.31E-03 | OV |
| DARC      | -1.60 | 8.35E-03 | OV |
| FLRT1     | 1.22  | 8.37E-03 | OV |
| HK3       | -1.24 | 8.52E-03 | OV |
| SNORA12   | -1.39 | 8.52E-03 | OV |
| NFAM1     | -1.08 | 8.57E-03 | OV |
| MGP       | -1.03 | 8.65E-03 | OV |
| FPR1      | -1.40 | 8.81E-03 | OV |
| PRSS35    | -1.59 | 8.87E-03 | OV |
| APOC1     | -1.08 | 8.88E-03 | OV |
| FCGR2C    | -1.48 | 8.92E-03 | OV |
| HCK       | -1.13 | 8.92E-03 | OV |
| SERPINA1  | -1.25 | 8.92E-03 | OV |
| CLDN11    | -1.27 | 8.94E-03 | OV |
| SAMSN1    | -1.16 | 8.96E-03 | OV |
| RTN1      | -1.22 | 9.10E-03 | OV |
| TFPI2     | -1.90 | 9.10E-03 | OV |
| APBB1IP   | -1.29 | 9.19E-03 | OV |
| COL9A3    | 1.48  | 9.30E-03 | OV |
| PTPN7     | -1.08 | 9.42E-03 | OV |
| PRSS33    | 2.14  | 9.46E-03 | OV |
| TMEM176B  | -1.21 | 9.46E-03 | OV |
| TMEM150B  | -1.32 | 9.51E-03 | OV |
| C16orf54  | -1.23 | 9.52E-03 | OV |

|           |       |          |    |
|-----------|-------|----------|----|
| LOC441666 | 1.07  | 9.60E-03 | OV |
| NCF2      | -1.04 | 9.68E-03 | OV |
| PTCH2     | 1.01  | 9.72E-03 | OV |
| LRR1Q1    | 1.17  | 9.77E-03 | OV |
| C13orf33  | -1.55 | 1.02E-02 | OV |
| C7orf58   | -1.05 | 1.02E-02 | OV |
| SDS       | -1.09 | 1.02E-02 | OV |
| EPSTI1    | -1.11 | 1.03E-02 | OV |
| IGF1      | -1.27 | 1.03E-02 | OV |
| RERG      | -1.53 | 1.04E-02 | OV |
| DKK2      | -1.25 | 1.04E-02 | OV |
| DNAH2     | 1.29  | 1.04E-02 | OV |
| LOC221442 | 1.10  | 1.04E-02 | OV |
| IL12RB1   | -1.42 | 1.04E-02 | OV |
| EVI2A     | -1.28 | 1.07E-02 | OV |
| TLR7      | -1.27 | 1.07E-02 | OV |
| MYO1F     | -1.05 | 1.08E-02 | OV |
| MATK      | -1.49 | 1.08E-02 | OV |
| CLEC7A    | -1.27 | 1.12E-02 | OV |
| AOAH      | -1.46 | 1.12E-02 | OV |
| IL32      | -1.12 | 1.13E-02 | OV |
| P2RY8     | -1.04 | 1.13E-02 | OV |
| CD180     | -1.10 | 1.18E-02 | OV |
| CYTIP     | -1.05 | 1.19E-02 | OV |
| LGR5      | 1.64  | 1.19E-02 | OV |
| ITGAM     | -1.28 | 1.19E-02 | OV |
| SAMD3     | -1.30 | 1.19E-02 | OV |
| FCRL6     | -1.67 | 1.20E-02 | OV |
| WDFY4     | -1.34 | 1.21E-02 | OV |
| SLC38A5   | -1.65 | 1.22E-02 | OV |
| AMH       | -2.00 | 1.23E-02 | OV |
| MARCO     | -2.01 | 1.23E-02 | OV |
| CD6       | -1.17 | 1.24E-02 | OV |
| MPEG1     | -1.07 | 1.24E-02 | OV |
| FCGR1A    | -1.20 | 1.25E-02 | OV |
| GPR65     | -1.09 | 1.25E-02 | OV |
| HGFAC     | 1.23  | 1.25E-02 | OV |
| TNFSF13B  | -1.18 | 1.26E-02 | OV |
| LOC349196 | -1.05 | 1.26E-02 | OV |
| RASAL3    | -1.10 | 1.26E-02 | OV |
| RASL11A   | -1.28 | 1.26E-02 | OV |

|           |       |          |    |
|-----------|-------|----------|----|
| GRAP2     | -1.43 | 1.29E-02 | OV |
| CD33      | -1.03 | 1.30E-02 | OV |
| C14orf49  | -1.12 | 1.30E-02 | OV |
| EMILIN3   | 1.15  | 1.31E-02 | OV |
| APOL3     | -1.18 | 1.32E-02 | OV |
| PARP15    | -1.20 | 1.32E-02 | OV |
| SGSM1     | 1.24  | 1.33E-02 | OV |
| CD209     | -1.17 | 1.34E-02 | OV |
| PTAFR     | -1.03 | 1.36E-02 | OV |
| CLEC2B    | -1.02 | 1.36E-02 | OV |
| MAN1A1    | -1.13 | 1.41E-02 | OV |
| FCGR1C    | -1.13 | 1.41E-02 | OV |
| C12orf68  | -1.02 | 1.42E-02 | OV |
| RGS18     | -1.12 | 1.43E-02 | OV |
| CD3G      | -1.47 | 1.44E-02 | OV |
| CD84      | -1.25 | 1.44E-02 | OV |
| LILRB4    | -1.24 | 1.44E-02 | OV |
| SERPINF1  | -1.24 | 1.46E-02 | OV |
| TTC9      | -1.15 | 1.46E-02 | OV |
| LOC285830 | -1.02 | 1.47E-02 | OV |
| GAPT      | -1.30 | 1.47E-02 | OV |
| CYSLTR1   | -1.18 | 1.52E-02 | OV |
| GDF1      | 1.07  | 1.52E-02 | OV |
| GFAP      | 1.45  | 1.52E-02 | OV |
| SIT1      | -1.39 | 1.53E-02 | OV |
| IL2RA     | -1.25 | 1.53E-02 | OV |
| PDGFRA    | -1.44 | 1.54E-02 | OV |
| PTPN22    | -1.24 | 1.54E-02 | OV |
| DOCK2     | -1.24 | 1.60E-02 | OV |
| TAGAP     | -1.03 | 1.61E-02 | OV |
| KCNMB2    | 1.11  | 1.62E-02 | OV |
| WNK2      | 1.01  | 1.63E-02 | OV |
| ALDH1A1   | -1.04 | 1.64E-02 | OV |
| CD48      | -1.28 | 1.64E-02 | OV |
| HLA-DRA   | -1.01 | 1.64E-02 | OV |
| CLEC10A   | -1.68 | 1.69E-02 | OV |
| SLC22A3   | -1.46 | 1.69E-02 | OV |
| GNLY      | -1.98 | 1.72E-02 | OV |
| PROM1     | 1.56  | 1.73E-02 | OV |
| LRRK2     | -1.10 | 1.73E-02 | OV |
| KLHL4     | -1.27 | 1.75E-02 | OV |

|          |       |          |    |
|----------|-------|----------|----|
| SLAMF8   | -1.24 | 1.75E-02 | OV |
| SSPO     | 1.12  | 1.76E-02 | OV |
| ANKRD22  | -1.30 | 1.78E-02 | OV |
| KRT15    | -1.67 | 1.78E-02 | OV |
| COPZ2    | -1.15 | 1.78E-02 | OV |
| SLC24A3  | -1.30 | 1.78E-02 | OV |
| FOLR3    | -2.21 | 1.79E-02 | OV |
| NTN4     | -1.03 | 1.79E-02 | OV |
| C12orf59 | -1.17 | 1.80E-02 | OV |
| LILRB5   | -1.08 | 1.81E-02 | OV |
| GPR82    | -1.30 | 1.84E-02 | OV |
| HSD11B1  | -1.23 | 1.85E-02 | OV |
| TSIX     | 1.14  | 1.85E-02 | OV |
| C2orf40  | 1.20  | 1.90E-02 | OV |
| ARHGAP15 | -1.19 | 1.95E-02 | OV |
| CCR2     | -1.54 | 1.97E-02 | OV |
| MEI1     | -1.33 | 1.97E-02 | OV |
| FPR3     | -1.18 | 1.99E-02 | OV |
| CFD      | -1.07 | 2.01E-02 | OV |
| FCGR2B   | -1.41 | 2.02E-02 | OV |
| PTPRC    | -1.19 | 2.02E-02 | OV |
| SLAMF6   | -1.40 | 2.03E-02 | OV |
| RARRES3  | -1.11 | 2.03E-02 | OV |
| VCAM1    | -1.41 | 2.07E-02 | OV |
| CHGA     | 1.60  | 2.10E-02 | OV |
| LEFTY2   | 1.44  | 2.12E-02 | OV |
| CAMK2B   | 1.09  | 2.14E-02 | OV |
| FAM81B   | 1.60  | 2.14E-02 | OV |
| SNAI2    | -1.19 | 2.14E-02 | OV |
| VTCN1    | -1.58 | 2.14E-02 | OV |
| ARMC3    | 1.16  | 2.15E-02 | OV |
| NCF1C    | -1.17 | 2.18E-02 | OV |
| IKZF1    | -1.01 | 2.20E-02 | OV |
| TMEM215  | -1.65 | 2.20E-02 | OV |
| LCN2     | -1.38 | 2.22E-02 | OV |
| CXCR3    | -1.37 | 2.22E-02 | OV |
| FYB      | -1.16 | 2.23E-02 | OV |
| GPR120   | -1.24 | 2.25E-02 | OV |
| KYNU     | -1.03 | 2.25E-02 | OV |
| LILRB2   | -1.07 | 2.26E-02 | OV |
| SLC2A5   | -1.05 | 2.28E-02 | OV |

|          |       |          |    |
|----------|-------|----------|----|
| RASGRF2  | -1.01 | 2.30E-02 | OV |
| GPR84    | -1.20 | 2.30E-02 | OV |
| ARHGAP20 | -1.19 | 2.33E-02 | OV |
| GZMK     | -1.85 | 2.33E-02 | OV |
| AMICA1   | -1.20 | 2.34E-02 | OV |
| SNX20    | -1.02 | 2.34E-02 | OV |
| CCR5     | -1.20 | 2.34E-02 | OV |
| FMO2     | -2.27 | 2.39E-02 | OV |
| RUNX1T1  | -1.44 | 2.41E-02 | OV |
| S100A3   | -1.19 | 2.42E-02 | OV |
| DDX11L2  | -1.42 | 2.47E-02 | OV |
| PDCD1LG2 | -1.18 | 2.47E-02 | OV |
| CPM      | -1.06 | 2.48E-02 | OV |
| SORCS2   | -1.83 | 2.49E-02 | OV |
| B3GNT3   | -1.32 | 2.51E-02 | OV |
| LRRC16B  | 1.11  | 2.59E-02 | OV |
| CBFA2T3  | -1.07 | 2.59E-02 | OV |
| CD5      | -1.21 | 2.60E-02 | OV |
| LOXL4    | -1.20 | 2.72E-02 | OV |
| TLR10    | -1.18 | 2.72E-02 | OV |
| TMEM71   | -1.01 | 2.72E-02 | OV |
| KLK1     | -1.80 | 2.73E-02 | OV |
| WISP1    | -1.16 | 2.75E-02 | OV |
| IL10     | -1.04 | 2.75E-02 | OV |
| SELL     | -1.09 | 2.75E-02 | OV |
| PDLIM3   | -1.17 | 2.79E-02 | OV |
| KLRK1    | -1.50 | 2.81E-02 | OV |
| SIGLEC10 | -1.16 | 2.83E-02 | OV |
| SECTM1   | -1.17 | 2.84E-02 | OV |
| KLK13    | -1.45 | 2.86E-02 | OV |
| FOXQ1    | -1.44 | 2.88E-02 | OV |
| GZMA     | -1.55 | 2.89E-02 | OV |
| CA8      | 1.22  | 2.90E-02 | OV |
| ADAM33   | 1.06  | 2.92E-02 | OV |
| DPEP1    | -1.68 | 2.94E-02 | OV |
| BCAT1    | 1.31  | 2.95E-02 | OV |
| PLA2G2A  | -2.29 | 3.02E-02 | OV |
| HGF      | -1.03 | 3.08E-02 | OV |
| LTA      | -1.06 | 3.10E-02 | OV |
| TFAP2C   | -1.12 | 3.10E-02 | OV |
| MNDA     | -1.03 | 3.13E-02 | OV |

|            |       |          |    |
|------------|-------|----------|----|
| DEFB1      | -2.38 | 3.14E-02 | OV |
| IGSF21     | -1.20 | 3.14E-02 | OV |
| CSF2RB     | -1.06 | 3.14E-02 | OV |
| DNAI1      | 1.34  | 3.16E-02 | OV |
| SLA2       | -1.08 | 3.17E-02 | OV |
| RGS6       | -1.15 | 3.21E-02 | OV |
| CCL3       | -1.02 | 3.23E-02 | OV |
| PRPH       | 1.10  | 3.25E-02 | OV |
| OSR1       | -1.30 | 3.26E-02 | OV |
| DIRAS1     | -1.49 | 3.27E-02 | OV |
| TSPAN7     | 1.05  | 3.32E-02 | OV |
| CLEC12A    | -1.32 | 3.38E-02 | OV |
| ATP1A3     | -2.06 | 3.40E-02 | OV |
| ANXA8L2    | -1.67 | 3.41E-02 | OV |
| AIM2       | -1.38 | 3.43E-02 | OV |
| SLC22A18AS | -1.11 | 3.43E-02 | OV |
| SFRP4      | -1.67 | 3.44E-02 | OV |
| CHRN4      | -1.19 | 3.47E-02 | OV |
| MGAT5B     | 1.59  | 3.50E-02 | OV |
| ADAMTS8    | 1.01  | 3.50E-02 | OV |
| RHD        | 1.13  | 3.53E-02 | OV |
| FGFR3      | 1.05  | 3.57E-02 | OV |
| PDZK1IP1   | -1.52 | 3.61E-02 | OV |
| RGS4       | -1.10 | 3.64E-02 | OV |
| VWA3A      | 1.45  | 3.73E-02 | OV |
| CCL5       | -1.31 | 3.77E-02 | OV |
| PRF1       | -1.11 | 3.77E-02 | OV |
| ATP1B2     | 1.07  | 3.79E-02 | OV |
| CLDN10     | -2.19 | 3.82E-02 | OV |
| CALML5     | -2.30 | 3.84E-02 | OV |
| BTC        | -1.12 | 3.85E-02 | OV |
| CRTAM      | -1.21 | 3.86E-02 | OV |
| CD96       | -1.03 | 3.87E-02 | OV |
| TIMP4      | -1.39 | 3.89E-02 | OV |
| HLA-DQA1   | -1.33 | 3.93E-02 | OV |
| XKR9       | -1.31 | 3.94E-02 | OV |
| EFCAB4B    | -1.02 | 3.95E-02 | OV |
| UBASH3A    | -1.23 | 3.97E-02 | OV |
| IL2RG      | -1.19 | 3.98E-02 | OV |
| STEAP4     | -1.34 | 4.01E-02 | OV |
| LUM        | -1.30 | 4.02E-02 | OV |

|         |       |          |      |
|---------|-------|----------|------|
| TNIK    | -1.31 | 4.03E-02 | OV   |
| CEACAM6 | -2.08 | 4.06E-02 | OV   |
| PTPRN   | -1.21 | 4.06E-02 | OV   |
| IBSP    | -1.52 | 4.08E-02 | OV   |
| ITK     | -1.37 | 4.12E-02 | OV   |
| CD2     | -1.53 | 4.18E-02 | OV   |
| SLC10A4 | 1.02  | 4.18E-02 | OV   |
| LYVE1   | -1.04 | 4.18E-02 | OV   |
| MSC     | -1.27 | 4.18E-02 | OV   |
| IL21R   | -1.69 | 4.22E-02 | OV   |
| FASLG   | -1.25 | 4.24E-02 | OV   |
| XCL1    | -1.13 | 4.27E-02 | OV   |
| NTRK2   | -1.12 | 4.29E-02 | OV   |
| TCF21   | -1.63 | 4.40E-02 | OV   |
| CLEC5A  | -1.07 | 4.47E-02 | OV   |
| OSM     | -1.05 | 4.47E-02 | OV   |
| FBN3    | 1.40  | 4.48E-02 | OV   |
| MEIS3   | -1.12 | 4.50E-02 | OV   |
| IL2RB   | -1.24 | 4.63E-02 | OV   |
| KRT4    | -2.18 | 4.64E-02 | OV   |
| KLK7    | -1.00 | 4.64E-02 | OV   |
| CD8B    | -1.31 | 4.65E-02 | OV   |
| GPR1    | -1.19 | 4.65E-02 | OV   |
| ITGB6   | -1.43 | 4.70E-02 | OV   |
| CLEC4E  | -1.34 | 4.71E-02 | OV   |
| THSD7A  | 1.01  | 4.73E-02 | OV   |
| PREX2   | 1.01  | 4.75E-02 | OV   |
| CCL14   | -1.34 | 4.84E-02 | OV   |
| EBI3    | -1.01 | 4.90E-02 | OV   |
| IMPG2   | 1.52  | 4.98E-02 | OV   |
| A2ML1   | 1.29  | 1.47E-05 | BRCA |
| ABAT    | -1.08 | 1.47E-10 | BRCA |
| ABCA12  | -1.61 | 2.98E-07 | BRCA |
| ABCA6   | -1.23 | 3.81E-11 | BRCA |
| ABCA8   | -1.24 | 2.07E-05 | BRCA |
| ABCA9   | -1.29 | 3.85E-09 | BRCA |
| ABCC11  | -1.33 | 2.76E-04 | BRCA |
| ABCC6   | -1.10 | 8.29E-09 | BRCA |
| ABCC8   | -1.41 | 2.47E-05 | BRCA |
| ABCC9   | -1.02 | 1.52E-13 | BRCA |
| ABCG2   | -1.06 | 1.20E-14 | BRCA |

|          |       |          |      |
|----------|-------|----------|------|
| ACCN3    | 1.01  | 5.56E-14 | BRCA |
| ACER2    | -1.27 | 3.38E-20 | BRCA |
| ACOX2    | -1.10 | 8.74E-08 | BRCA |
| ACVR1C   | -1.02 | 5.32E-06 | BRCA |
| ADAM22   | -1.26 | 2.22E-15 | BRCA |
| ADAMTS15 | -1.68 | 1.17E-11 | BRCA |
| ADAMTS18 | -1.06 | 9.76E-07 | BRCA |
| ADAT3    | 1.02  | 1.69E-25 | BRCA |
| ADCK5    | 1.02  | 1.88E-36 | BRCA |
| ADCY5    | -1.35 | 2.28E-07 | BRCA |
| ADH1B    | -1.86 | 2.19E-04 | BRCA |
| ADIPOQ   | -2.13 | 3.07E-05 | BRCA |
| AFF3     | -1.38 | 2.49E-09 | BRCA |
| AGER     | 1.04  | 3.22E-28 | BRCA |
| AGR2     | -1.48 | 4.41E-06 | BRCA |
| AGR3     | -2.01 | 3.90E-05 | BRCA |
| AGTR1    | -1.47 | 2.33E-07 | BRCA |
| AIM1L    | 1.04  | 4.00E-09 | BRCA |
| AK5      | -1.32 | 2.14E-07 | BRCA |
| AKAP12   | -1.02 | 2.26E-12 | BRCA |
| AKAP2    | -1.08 | 6.67E-12 | BRCA |
| ALOX12P2 | 1.11  | 1.07E-06 | BRCA |
| AMPH     | -1.07 | 3.73E-10 | BRCA |
| ANGPTL1  | -1.20 | 1.46E-10 | BRCA |
| ANGPTL6  | 1.05  | 9.30E-17 | BRCA |
| ANKRD30A | -2.91 | 2.97E-08 | BRCA |
| ANKRD30B | -1.24 | 1.28E-04 | BRCA |
| ANKRD43  | -1.22 | 4.53E-07 | BRCA |
| ANO3     | -1.33 | 4.49E-07 | BRCA |
| ANO5     | -1.18 | 2.77E-07 | BRCA |
| AQP7     | -1.13 | 2.52E-04 | BRCA |
| AQPEP    | -1.00 | 4.22E-06 | BRCA |
| ARHGAP20 | -1.18 | 5.08E-14 | BRCA |
| ARHGEF38 | -1.20 | 2.55E-10 | BRCA |
| AR       | -2.15 | 6.63E-14 | BRCA |
| ASPA     | -1.11 | 1.50E-09 | BRCA |
| ATAD3B   | 1.04  | 6.56E-35 | BRCA |
| ATP1A2   | -1.15 | 2.65E-05 | BRCA |
| ATP1A4   | -1.89 | 2.59E-15 | BRCA |
| AURKB    | 1.41  | 6.67E-26 | BRCA |
| AVPR1A   | -1.28 | 3.08E-17 | BRCA |

|           |       |          |      |
|-----------|-------|----------|------|
| B3GALT5   | -1.14 | 3.68E-06 | BRCA |
| B3GNT4    | 1.08  | 2.22E-13 | BRCA |
| BAIAP2L2  | 1.33  | 2.08E-20 | BRCA |
| BARX1     | 1.28  | 8.79E-10 | BRCA |
| BIRC5     | 1.26  | 3.10E-18 | BRCA |
| C14orf73  | 1.26  | 1.35E-15 | BRCA |
| C16orf59  | 1.02  | 8.34E-21 | BRCA |
| C16orf79  | 1.21  | 1.75E-25 | BRCA |
| C18orf56  | 1.14  | 3.59E-22 | BRCA |
| C19orf20  | 1.25  | 2.83E-23 | BRCA |
| C19orf60  | 1.09  | 7.41E-40 | BRCA |
| C1orf106  | 1.01  | 1.73E-07 | BRCA |
| C20orf151 | 1.01  | 8.04E-19 | BRCA |
| C21orf70  | 1.05  | 1.21E-39 | BRCA |
| C2CD4D    | 1.13  | 8.16E-26 | BRCA |
| C2orf48   | 1.13  | 5.48E-12 | BRCA |
| C4orf48   | 1.43  | 1.87E-24 | BRCA |
| C6orf108  | 1.10  | 7.41E-40 | BRCA |
| C6orf223  | 1.10  | 4.59E-07 | BRCA |
| C8ORFK29  | 1.07  | 1.83E-15 | BRCA |
| CALML5    | 1.52  | 8.00E-08 | BRCA |
| CAPS      | 1.21  | 7.38E-18 | BRCA |
| CBS       | 1.15  | 7.45E-14 | BRCA |
| CBX2      | 1.01  | 8.55E-13 | BRCA |
| CCDC154   | 1.09  | 3.02E-15 | BRCA |
| CCDC42B   | 1.09  | 8.63E-14 | BRCA |
| CCDC78    | 1.03  | 8.24E-10 | BRCA |
| CCDC85B   | 1.04  | 1.37E-26 | BRCA |
| CCDC88B   | 1.00  | 2.08E-25 | BRCA |
| CCL3L1    | 1.19  | 2.00E-15 | BRCA |
| CCNE1     | 1.12  | 1.19E-17 | BRCA |
| CD19      | 1.17  | 6.51E-07 | BRCA |
| CDC20     | 1.17  | 1.45E-17 | BRCA |
| CDC45     | 1.12  | 2.00E-16 | BRCA |
| CDCA3     | 1.02  | 1.91E-18 | BRCA |
| CDKN2A    | 1.37  | 1.07E-23 | BRCA |
| CDT1      | 1.24  | 5.97E-28 | BRCA |
| CENPA     | 1.05  | 3.05E-15 | BRCA |
| CENPM     | 1.09  | 1.53E-21 | BRCA |
| CHODL     | 1.13  | 2.07E-08 | BRCA |
| CHTF18    | 1.07  | 5.39E-31 | BRCA |

|           |      |          |      |
|-----------|------|----------|------|
| CLDN3     | 1.02 | 2.25E-11 | BRCA |
| CLEC18A   | 1.14 | 3.56E-20 | BRCA |
| CLEC18B   | 1.10 | 2.13E-14 | BRCA |
| CLIC3     | 1.07 | 7.13E-13 | BRCA |
| COL11A2   | 1.43 | 5.77E-17 | BRCA |
| COL2A1    | 1.14 | 3.77E-04 | BRCA |
| COL9A3    | 1.55 | 1.04E-15 | BRCA |
| COMTD1    | 1.17 | 1.79E-32 | BRCA |
| CRABP1    | 1.12 | 2.60E-04 | BRCA |
| CRLF1     | 1.01 | 1.08E-09 | BRCA |
| CYP2D7P1  | 1.03 | 8.60E-19 | BRCA |
| DDN       | 1.09 | 1.44E-12 | BRCA |
| DGCR5     | 1.09 | 1.02E-12 | BRCA |
| DNER      | 1.04 | 1.15E-05 | BRCA |
| DUSP9     | 1.04 | 2.36E-06 | BRCA |
| E2F1      | 1.02 | 1.46E-20 | BRCA |
| EMID2     | 1.09 | 1.98E-10 | BRCA |
| EN1       | 1.32 | 1.35E-12 | BRCA |
| ENHO      | 1.24 | 6.65E-15 | BRCA |
| ESPNL     | 1.10 | 2.15E-12 | BRCA |
| FAM131C   | 1.35 | 1.01E-15 | BRCA |
| FAM64A    | 1.06 | 4.54E-16 | BRCA |
| FBN3      | 1.09 | 4.29E-06 | BRCA |
| FER1L4    | 1.04 | 2.60E-13 | BRCA |
| FOXD1     | 1.20 | 7.10E-10 | BRCA |
| FOXH1     | 1.25 | 2.20E-20 | BRCA |
| FUT7      | 1.15 | 7.21E-18 | BRCA |
| FZD9      | 1.21 | 2.50E-10 | BRCA |
| GAL       | 1.40 | 5.56E-11 | BRCA |
| GFRA3     | 1.05 | 4.28E-07 | BRCA |
| GJB3      | 1.56 | 4.27E-14 | BRCA |
| GJB5      | 1.62 | 2.52E-16 | BRCA |
| GLDC      | 1.21 | 2.37E-07 | BRCA |
| GLI4      | 1.11 | 6.11E-37 | BRCA |
| GPC2      | 1.30 | 3.06E-20 | BRCA |
| GSDMC     | 1.16 | 5.75E-10 | BRCA |
| GSTM1     | 2.26 | 1.57E-11 | BRCA |
| HAGHL     | 1.21 | 9.39E-17 | BRCA |
| HES4      | 1.41 | 2.44E-34 | BRCA |
| HIST1H2AM | 1.04 | 6.28E-11 | BRCA |
| HIST1H2BO | 1.09 | 2.65E-11 | BRCA |

|            |      |          |      |
|------------|------|----------|------|
| HIST2H3C   | 1.02 | 8.28E-12 | BRCA |
| HIST3H2A   | 1.08 | 6.66E-11 | BRCA |
| HOMER3     | 1.04 | 5.30E-37 | BRCA |
| HPDL       | 1.21 | 7.67E-14 | BRCA |
| IER5L      | 1.10 | 1.83E-29 | BRCA |
| ISG15      | 1.29 | 2.42E-16 | BRCA |
| JSRP1      | 1.85 | 2.68E-22 | BRCA |
| KCNG1      | 1.48 | 7.19E-12 | BRCA |
| KIF18B     | 1.16 | 5.81E-17 | BRCA |
| KIF1A      | 1.04 | 7.01E-04 | BRCA |
| KIFC2      | 1.03 | 7.96E-25 | BRCA |
| KRT16      | 1.70 | 6.55E-11 | BRCA |
| KRT6A      | 1.21 | 7.26E-05 | BRCA |
| KRT6B      | 1.08 | 4.39E-04 | BRCA |
| KRT6C      | 1.41 | 6.44E-08 | BRCA |
| KRT81      | 1.61 | 1.11E-10 | BRCA |
| KRT86      | 1.10 | 1.08E-09 | BRCA |
| LCN2       | 1.01 | 7.38E-05 | BRCA |
| LGALS4     | 1.22 | 2.19E-17 | BRCA |
| LGALS7     | 1.02 | 5.97E-06 | BRCA |
| LIME1      | 1.26 | 1.31E-24 | BRCA |
| LOC339535  | 1.15 | 5.33E-07 | BRCA |
| LOC400696  | 1.36 | 4.96E-12 | BRCA |
| LTB        | 1.21 | 1.15E-13 | BRCA |
| LYG1       | 1.03 | 6.15E-21 | BRCA |
| MEF2B      | 1.28 | 1.13E-28 | BRCA |
| MIA        | 1.14 | 1.33E-05 | BRCA |
| MIF        | 1.08 | 7.65E-25 | BRCA |
| MND1       | 1.04 | 5.09E-14 | BRCA |
| MSLN       | 2.43 | 1.82E-18 | BRCA |
| MST1P9     | 1.15 | 9.17E-15 | BRCA |
| MYBL2      | 1.28 | 1.51E-15 | BRCA |
| MYLK2      | 1.32 | 1.59E-20 | BRCA |
| NACA2      | 1.08 | 8.95E-35 | BRCA |
| NCRNA00105 | 1.02 | 3.41E-20 | BRCA |
| NFKBIL2    | 1.01 | 1.01E-25 | BRCA |
| NOTUM      | 1.30 | 1.79E-12 | BRCA |
| NOXO1      | 1.14 | 6.32E-15 | BRCA |
| NPM2       | 1.05 | 1.95E-09 | BRCA |
| NRTN       | 1.34 | 6.88E-17 | BRCA |
| NSUN5P1    | 1.11 | 2.61E-39 | BRCA |

|          |      |          |      |
|----------|------|----------|------|
| ORC6L    | 1.01 | 2.46E-18 | BRCA |
| P2RY11   | 1.59 | 9.52E-15 | BRCA |
| PAQR6    | 1.05 | 9.54E-19 | BRCA |
| PCSK1N   | 2.18 | 1.12E-19 | BRCA |
| PIF1     | 1.55 | 3.09E-39 | BRCA |
| PITX1    | 1.00 | 8.57E-07 | BRCA |
| PKMYT1   | 1.44 | 1.04E-22 | BRCA |
| POMC     | 1.07 | 4.31E-15 | BRCA |
| PPP1R14C | 1.07 | 1.95E-06 | BRCA |
| PRAME    | 1.46 | 2.76E-05 | BRCA |
| PRR22    | 1.00 | 2.28E-23 | BRCA |
| PRR7     | 1.30 | 1.53E-26 | BRCA |
| PRSS50   | 1.23 | 6.44E-10 | BRCA |
| RAD54L   | 1.06 | 4.87E-18 | BRCA |
| RBP1     | 1.15 | 8.73E-16 | BRCA |
| RCOR2    | 1.09 | 1.52E-13 | BRCA |
| RECQL4   | 1.16 | 1.69E-24 | BRCA |
| RFPL3S   | 1.14 | 1.79E-25 | BRCA |
| RLTPR    | 1.21 | 1.15E-13 | BRCA |
| RNF112   | 1.01 | 9.57E-17 | BRCA |
| ROPN1B   | 1.18 | 1.64E-05 | BRCA |
| RUFY4    | 1.36 | 2.00E-16 | BRCA |
| SCAND1   | 1.01 | 9.69E-33 | BRCA |
| SCT      | 1.05 | 4.16E-08 | BRCA |
| SH2B2    | 1.00 | 2.55E-22 | BRCA |
| SH3D20   | 1.10 | 6.22E-19 | BRCA |
| SPC24    | 1.16 | 1.76E-14 | BRCA |
| SPIB     | 1.08 | 1.22E-07 | BRCA |
| SYCE1L   | 1.65 | 2.48E-18 | BRCA |
| SYT8     | 1.36 | 2.51E-07 | BRCA |
| TCAP     | 1.26 | 1.16E-16 | BRCA |
| TMEM105  | 1.05 | 7.59E-09 | BRCA |
| TMEM191A | 1.05 | 7.85E-26 | BRCA |
| TMPRSS5  | 1.12 | 3.04E-13 | BRCA |
| TNFRSF25 | 1.13 | 3.82E-27 | BRCA |
| TNFRSF4  | 1.08 | 8.77E-26 | BRCA |
| TNFRSF6B | 1.01 | 2.12E-23 | BRCA |
| TNNI2    | 1.03 | 7.64E-11 | BRCA |
| TNNT1    | 1.42 | 9.17E-08 | BRCA |
| TPRXL    | 1.07 | 4.23E-09 | BRCA |
| TREX2    | 1.05 | 9.30E-17 | BRCA |

|           |       |          |      |
|-----------|-------|----------|------|
| TROAP     | 1.20  | 6.50E-19 | BRCA |
| TSIX      | 1.68  | 1.96E-17 | BRCA |
| TSPAN10   | 1.21  | 1.46E-22 | BRCA |
| TSPO      | 1.02  | 4.28E-38 | BRCA |
| TUBB8     | 1.21  | 1.72E-24 | BRCA |
| UBE2C     | 1.24  | 2.17E-16 | BRCA |
| UBE2S     | 1.12  | 1.52E-30 | BRCA |
| UPK3BL    | 1.11  | 5.26E-13 | BRCA |
| UPK3B     | 1.34  | 2.04E-18 | BRCA |
| VGf       | 1.75  | 6.32E-18 | BRCA |
| VGLL1     | 1.12  | 4.87E-04 | BRCA |
| WNT6      | 1.60  | 2.15E-15 | BRCA |
| YJEFN3    | 1.09  | 9.42E-20 | BRCA |
| ZNHIT2    | 1.03  | 6.80E-08 | BRCA |
| BAGE2     | -1.07 | 1.69E-11 | BRCA |
| BCAS1     | -1.08 | 1.10E-04 | BRCA |
| BICC1     | -1.40 | 1.56E-14 | BRCA |
| BMPR1B    | -1.10 | 2.26E-03 | BRCA |
| BPIL1     | -1.25 | 4.10E-04 | BRCA |
| BTBD8     | -1.25 | 1.11E-15 | BRCA |
| C1QTNF7   | -1.26 | 3.91E-11 | BRCA |
| C1orf150  | -1.28 | 5.07E-13 | BRCA |
| C1orf173  | -1.12 | 5.71E-05 | BRCA |
| C1orf64   | -1.95 | 4.13E-06 | BRCA |
| C20orf114 | -1.12 | 2.13E-03 | BRCA |
| C20orf94  | -1.02 | 4.23E-16 | BRCA |
| C4orf31   | -1.34 | 1.64E-12 | BRCA |
| C6orf97   | -1.13 | 8.76E-09 | BRCA |
| C6        | -1.11 | 1.23E-04 | BRCA |
| C7orf58   | -1.20 | 3.80E-13 | BRCA |
| C8orf34   | -1.03 | 1.50E-07 | BRCA |
| CA12      | -1.26 | 2.44E-10 | BRCA |
| CACNA2D1  | -2.11 | 1.08E-19 | BRCA |
| CADM2     | -1.08 | 1.86E-06 | BRCA |
| CAPN8     | -1.12 | 4.29E-04 | BRCA |
| CASQ1     | -1.11 | 1.09E-09 | BRCA |
| CASQ2     | -1.02 | 2.46E-07 | BRCA |
| CCDC144A  | -1.20 | 4.19E-11 | BRCA |
| CCDC158   | -1.44 | 7.79E-13 | BRCA |
| CCDC160   | -1.12 | 1.00E-09 | BRCA |
| CCNT1     | -1.36 | 1.97E-19 | BRCA |

|          |       |          |      |
|----------|-------|----------|------|
| CD36     | -1.24 | 2.62E-07 | BRCA |
| CDKL5    | -1.32 | 9.50E-14 | BRCA |
| CEACAM5  | -1.16 | 3.20E-03 | BRCA |
| CES1     | -1.36 | 7.63E-08 | BRCA |
| CHAD     | -1.20 | 9.73E-05 | BRCA |
| CHL1     | -1.35 | 5.93E-09 | BRCA |
| CIDEA    | -1.30 | 3.35E-04 | BRCA |
| CIDEC    | -1.18 | 1.32E-03 | BRCA |
| CLGN     | -1.06 | 1.58E-05 | BRCA |
| CLIC6    | -1.46 | 2.77E-06 | BRCA |
| CLSTN2   | -1.35 | 6.03E-09 | BRCA |
| CNTN1    | -1.44 | 5.12E-11 | BRCA |
| CNTN4    | -1.14 | 3.86E-09 | BRCA |
| CNTNAP2  | -1.16 | 3.34E-04 | BRCA |
| COL14A1  | -1.13 | 6.56E-12 | BRCA |
| CPA3     | -1.08 | 2.26E-06 | BRCA |
| CPB1     | -1.96 | 4.58E-04 | BRCA |
| CSRNP3   | -1.25 | 6.35E-12 | BRCA |
| CST1     | -1.16 | 2.63E-03 | BRCA |
| CST2     | -1.55 | 1.20E-08 | BRCA |
| CT62     | -1.30 | 9.98E-08 | BRCA |
| CTTNBP2  | -1.15 | 2.08E-10 | BRCA |
| CX3CR1   | -1.08 | 3.14E-10 | BRCA |
| CYP2A6   | -1.36 | 2.00E-04 | BRCA |
| CYP2B7P1 | -1.77 | 1.02E-04 | BRCA |
| CYP4B1   | -1.07 | 1.54E-04 | BRCA |
| CYP4X1   | -1.25 | 4.86E-06 | BRCA |
| CYP4Z1   | -2.06 | 3.26E-06 | BRCA |
| CYP4Z2P  | -1.67 | 9.24E-07 | BRCA |
| DACH1    | -1.28 | 1.28E-07 | BRCA |
| DCDC2    | -1.12 | 2.74E-05 | BRCA |
| DCLK1    | -1.25 | 1.57E-11 | BRCA |
| DDI2     | -1.18 | 5.59E-17 | BRCA |
| DDR2     | -1.11 | 6.53E-11 | BRCA |
| DEFB132  | -1.33 | 1.28E-06 | BRCA |
| DNAH5    | -1.22 | 8.09E-09 | BRCA |
| DNAH7    | -1.13 | 1.77E-13 | BRCA |
| DOC2B    | -1.04 | 1.24E-07 | BRCA |
| DYNC2H1  | -1.18 | 1.70E-21 | BRCA |
| EBF2     | -1.20 | 2.97E-12 | BRCA |
| EDIL3    | -1.49 | 5.24E-13 | BRCA |

|          |       |          |      |
|----------|-------|----------|------|
| ENTPD3   | -1.07 | 3.05E-10 | BRCA |
| EPHA3    | -1.03 | 5.57E-10 | BRCA |
| ERBB4    | -1.99 | 3.83E-10 | BRCA |
| ESR1     | -1.81 | 3.12E-12 | BRCA |
| EYA4     | -1.10 | 2.85E-07 | BRCA |
| F13A1    | -1.01 | 1.74E-10 | BRCA |
| F7       | -1.22 | 1.84E-06 | BRCA |
| FABP4    | -1.17 | 2.20E-03 | BRCA |
| FAIM2    | -1.05 | 1.18E-07 | BRCA |
| FAM106C  | -1.16 | 3.64E-13 | BRCA |
| FAM184B  | -1.29 | 4.60E-07 | BRCA |
| FAM196B  | -1.10 | 4.65E-06 | BRCA |
| FAM198B  | -1.09 | 1.05E-19 | BRCA |
| FAM63B   | -1.04 | 3.44E-19 | BRCA |
| FAT3     | -1.59 | 3.02E-20 | BRCA |
| FAT4     | -1.09 | 7.59E-14 | BRCA |
| FGF10    | -1.80 | 2.13E-10 | BRCA |
| FHL5     | -1.17 | 5.80E-13 | BRCA |
| FLRT3    | -1.09 | 6.93E-07 | BRCA |
| FMN1     | -1.21 | 1.47E-14 | BRCA |
| FMO2     | -1.02 | 2.18E-05 | BRCA |
| FOXA1    | -1.47 | 7.00E-09 | BRCA |
| FOXP2    | -1.08 | 8.68E-09 | BRCA |
| GABRB3   | -1.67 | 1.55E-10 | BRCA |
| GALNT5   | -1.09 | 2.31E-08 | BRCA |
| GCNT4    | -1.10 | 1.74E-12 | BRCA |
| GFRA1    | -1.96 | 5.84E-11 | BRCA |
| GLDN     | -1.01 | 4.49E-09 | BRCA |
| GLRB     | -1.10 | 2.99E-11 | BRCA |
| GP2      | -2.24 | 1.76E-07 | BRCA |
| GPD1     | -1.06 | 1.83E-03 | BRCA |
| GPR81    | -1.42 | 3.74E-12 | BRCA |
| GPR98    | -1.09 | 1.25E-04 | BRCA |
| GRIK3    | -1.07 | 7.58E-05 | BRCA |
| GRPR     | -1.99 | 4.99E-10 | BRCA |
| GTF2A1   | -1.12 | 4.42E-20 | BRCA |
| GUSBP3   | -1.03 | 5.86E-15 | BRCA |
| HEPACAM2 | -1.47 | 1.21E-06 | BRCA |
| HIPK3    | -1.21 | 1.73E-20 | BRCA |
| HMCN1    | -1.03 | 1.30E-11 | BRCA |
| HMGCS2   | -2.16 | 4.36E-06 | BRCA |

|              |       |          |      |
|--------------|-------|----------|------|
| HRASLS5      | -1.19 | 7.84E-06 | BRCA |
| HRNR         | -1.08 | 1.71E-11 | BRCA |
| HS6ST3       | -1.17 | 8.11E-05 | BRCA |
| HTR2B        | -1.04 | 1.36E-16 | BRCA |
| IGF1         | -1.03 | 5.11E-08 | BRCA |
| IGSF9B       | -1.20 | 4.49E-09 | BRCA |
| IL20RA       | -1.59 | 3.07E-12 | BRCA |
| IL33         | -1.05 | 1.10E-05 | BRCA |
| IL6ST        | -2.07 | 2.54E-23 | BRCA |
| INPP4B       | -1.05 | 8.24E-11 | BRCA |
| IPMK         | -1.04 | 2.01E-14 | BRCA |
| ITGA8        | -1.17 | 1.04E-10 | BRCA |
| ITPR1        | -1.08 | 1.60E-18 | BRCA |
| KCND3        | -1.77 | 1.87E-14 | BRCA |
| KCNJ3        | -1.62 | 1.20E-04 | BRCA |
| KERA         | -1.10 | 1.26E-08 | BRCA |
| KIAA0754     | -1.16 | 9.30E-12 | BRCA |
| KIAA1244     | -1.08 | 9.50E-13 | BRCA |
| KIAA1377     | -1.08 | 4.13E-13 | BRCA |
| KLHDC7A      | -1.47 | 1.59E-05 | BRCA |
| KLHL11       | -1.17 | 4.68E-19 | BRCA |
| KL           | -1.18 | 2.15E-15 | BRCA |
| LAMA2        | -1.10 | 2.48E-11 | BRCA |
| LCOR         | -1.17 | 2.71E-18 | BRCA |
| LEP          | -1.31 | 5.43E-04 | BRCA |
| LGALS12      | -1.21 | 2.70E-05 | BRCA |
| LNPEP        | -1.12 | 6.26E-20 | BRCA |
| LOC100272216 | -1.07 | 2.30E-15 | BRCA |
| LOC145837    | -1.07 | 7.66E-06 | BRCA |
| LOC148696    | -1.34 | 1.27E-14 | BRCA |
| LOC728606    | -1.14 | 1.20E-04 | BRCA |
| LONRF2       | -1.31 | 5.89E-09 | BRCA |
| LPHN3        | -1.09 | 2.66E-08 | BRCA |
| LRP1B        | -1.25 | 3.54E-05 | BRCA |
| LRRC31       | -2.30 | 1.10E-10 | BRCA |
| LRRC37A2     | -1.13 | 3.39E-34 | BRCA |
| LUZP2        | -1.09 | 1.17E-06 | BRCA |
| MAN2A1       | -1.04 | 1.82E-19 | BRCA |
| MAOA         | -1.10 | 1.54E-06 | BRCA |
| MAST4        | -1.09 | 1.10E-14 | BRCA |
| MBNL3        | -1.02 | 3.68E-11 | BRCA |

|         |       |          |      |
|---------|-------|----------|------|
| MGAT5   | -1.07 | 5.47E-13 | BRCA |
| MICALCL | -1.16 | 1.15E-13 | BRCA |
| MKX     | -1.09 | 5.65E-06 | BRCA |
| MMRN1   | -1.18 | 6.35E-07 | BRCA |
| MS4A2   | -1.21 | 1.55E-09 | BRCA |
| MUC6    | -1.01 | 9.81E-03 | BRCA |
| MYH11   | -1.07 | 4.21E-07 | BRCA |
| MYO9A   | -1.03 | 1.88E-19 | BRCA |
| MYOCD   | -1.26 | 3.66E-12 | BRCA |
| MYRIP   | -1.46 | 3.03E-13 | BRCA |
| N4BP2   | -1.04 | 1.10E-15 | BRCA |
| NAT1    | -1.44 | 8.08E-08 | BRCA |
| NAV3    | -1.04 | 1.42E-09 | BRCA |
| NBEAL1  | -1.24 | 2.49E-17 | BRCA |
| NBEA    | -1.14 | 9.14E-15 | BRCA |
| NCAM2   | -1.42 | 4.21E-10 | BRCA |
| NCOA2   | -1.02 | 2.86E-13 | BRCA |
| NEK10   | -1.44 | 8.16E-07 | BRCA |
| NEK5    | -1.03 | 4.62E-08 | BRCA |
| NELL2   | -1.09 | 1.29E-05 | BRCA |
| NFATC2  | -1.17 | 3.10E-12 | BRCA |
| NHSL2   | -1.35 | 7.51E-22 | BRCA |
| NOVA1   | -1.29 | 3.59E-07 | BRCA |
| NRXN3   | -1.03 | 9.37E-10 | BRCA |
| NTN4    | -1.17 | 4.64E-12 | BRCA |
| NTRK2   | -1.15 | 2.30E-07 | BRCA |
| ODZ2    | -1.05 | 1.97E-06 | BRCA |
| OGN     | -1.12 | 3.97E-05 | BRCA |
| OMD     | -1.07 | 7.09E-08 | BRCA |
| P2RY12  | -1.01 | 1.53E-08 | BRCA |
| P2RY1   | -1.00 | 4.00E-16 | BRCA |
| PAR5    | -1.42 | 1.17E-14 | BRCA |
| PARD3B  | -1.22 | 1.06E-18 | BRCA |
| PCDHA4  | -1.01 | 1.22E-05 | BRCA |
| PCDHA6  | -1.17 | 2.73E-07 | BRCA |
| PCDHGA2 | -1.07 | 8.77E-10 | BRCA |
| PCDHGA4 | -1.02 | 6.36E-10 | BRCA |
| PCDHGA9 | -1.00 | 1.63E-11 | BRCA |
| PCDHGB7 | -1.18 | 1.31E-13 | BRCA |
| PCK1    | -1.42 | 4.08E-05 | BRCA |
| PDE11A  | -1.15 | 1.54E-10 | BRCA |

|             |       |          |      |
|-------------|-------|----------|------|
| PDE3A       | -1.22 | 1.71E-13 | BRCA |
| PDE8B       | -1.07 | 1.44E-08 | BRCA |
| PDK4        | -1.15 | 9.16E-09 | BRCA |
| PGR         | -1.81 | 2.87E-07 | BRCA |
| PIP         | -1.68 | 9.07E-04 | BRCA |
| PIWIL2      | -1.07 | 1.24E-09 | BRCA |
| PLCXD3      | -1.10 | 4.41E-06 | BRCA |
| PLIN1       | -1.26 | 3.93E-04 | BRCA |
| PLXNC1      | -1.19 | 4.38E-13 | BRCA |
| PPAN-P2RY11 | -1.56 | 1.32E-05 | BRCA |
| PPFIA2      | -1.01 | 3.94E-11 | BRCA |
| PREX2       | -1.84 | 6.25E-19 | BRCA |
| PRG4        | -1.01 | 7.84E-05 | BRCA |
| PRKG1       | -1.40 | 2.14E-17 | BRCA |
| PRKG2       | -1.42 | 6.08E-16 | BRCA |
| PRND        | -1.04 | 2.15E-09 | BRCA |
| PRSS21      | -1.65 | 9.28E-09 | BRCA |
| PTPRT       | -1.76 | 7.92E-07 | BRCA |
| RAB27B      | -1.29 | 5.36E-15 | BRCA |
| RAB30       | -1.14 | 4.47E-15 | BRCA |
| RALGAPA2    | -1.31 | 1.00E-19 | BRCA |
| RANBP3L     | -1.13 | 9.79E-07 | BRCA |
| RAPGEF6     | -1.10 | 2.72E-17 | BRCA |
| RASEF       | -1.38 | 2.75E-11 | BRCA |
| RASSF6      | -1.05 | 1.01E-07 | BRCA |
| RBMS3       | -1.03 | 4.09E-13 | BRCA |
| RERGL       | -1.08 | 7.62E-05 | BRCA |
| REST        | -1.02 | 4.12E-16 | BRCA |
| RGPD5       | -1.12 | 7.83E-15 | BRCA |
| RGS22       | -1.56 | 1.18E-08 | BRCA |
| RGS7BP      | -1.25 | 4.61E-11 | BRCA |
| ROBO2       | -1.51 | 9.57E-08 | BRCA |
| RORB        | -1.06 | 2.93E-09 | BRCA |
| RPS28       | -1.49 | 5.49E-06 | BRCA |
| RPS6KA6     | -1.05 | 6.03E-08 | BRCA |
| RUNDC2A     | -1.03 | 5.87E-20 | BRCA |
| RUNX1T1     | -1.22 | 1.70E-14 | BRCA |
| SCGB1D2     | -1.62 | 1.29E-03 | BRCA |
| SCGB2A2     | -2.15 | 1.80E-04 | BRCA |
| SCN2B       | -1.28 | 2.61E-08 | BRCA |
| SCN3A       | -1.11 | 5.59E-08 | BRCA |

|            |       |          |      |
|------------|-------|----------|------|
| SCN7A      | -2.12 | 5.02E-17 | BRCA |
| SCUBE2     | -1.74 | 1.04E-11 | BRCA |
| SEMA3D     | -1.04 | 1.13E-07 | BRCA |
| SEMA3E     | -1.42 | 1.86E-08 | BRCA |
| SEMA5A     | -1.07 | 7.95E-17 | BRCA |
| SERINC5    | -1.23 | 1.30E-15 | BRCA |
| SERPINA11  | -1.70 | 2.23E-06 | BRCA |
| SLC13A2    | -1.01 | 8.22E-04 | BRCA |
| SLC14A2    | -1.38 | 1.86E-11 | BRCA |
| SLC16A12   | -1.28 | 4.81E-10 | BRCA |
| SLC16A6    | -1.08 | 9.01E-07 | BRCA |
| SLC16A7    | -1.26 | 1.57E-13 | BRCA |
| SLC18A2    | -1.23 | 4.11E-10 | BRCA |
| SLC24A2    | -1.00 | 3.23E-05 | BRCA |
| SLC30A8    | -1.28 | 1.21E-03 | BRCA |
| SLC38A11   | -1.16 | 2.48E-12 | BRCA |
| SLC40A1    | -1.29 | 8.09E-16 | BRCA |
| SLC44A4    | -1.37 | 1.18E-06 | BRCA |
| SLC44A5    | -1.09 | 2.36E-06 | BRCA |
| SLC4A4     | -1.05 | 8.98E-07 | BRCA |
| SLC7A2     | -1.62 | 7.22E-11 | BRCA |
| SLIT2      | -1.29 | 6.73E-14 | BRCA |
| SLITRK6    | -1.43 | 2.18E-05 | BRCA |
| SNORD116-4 | -1.38 | 1.59E-08 | BRCA |
| SORCS1     | -1.48 | 2.94E-06 | BRCA |
| SOX5       | -1.09 | 4.91E-10 | BRCA |
| SPATA18    | -1.12 | 1.88E-12 | BRCA |
| ST8SIA6    | -1.82 | 2.40E-14 | BRCA |
| STK32B     | -1.11 | 4.96E-08 | BRCA |
| SVEP1      | -1.19 | 2.19E-10 | BRCA |
| SYNPO2     | -1.00 | 4.37E-11 | BRCA |
| SYT1       | -1.16 | 1.83E-05 | BRCA |
| SYT9       | -1.74 | 1.19E-07 | BRCA |
| SYTL5      | -1.26 | 1.46E-05 | BRCA |
| TAOK1      | -1.22 | 1.32E-15 | BRCA |
| TAT        | -1.07 | 8.33E-03 | BRCA |
| TBC1D9     | -1.07 | 7.91E-13 | BRCA |
| TDRD1      | -1.11 | 3.31E-05 | BRCA |
| TFAP2B     | -1.65 | 3.32E-04 | BRCA |
| TFF1       | -2.18 | 8.78E-05 | BRCA |
| TFF3       | -1.28 | 2.23E-04 | BRCA |

|          |       |          |      |
|----------|-------|----------|------|
| TGFBR3   | -1.10 | 8.06E-10 | BRCA |
| THRSP    | -1.22 | 3.26E-05 | BRCA |
| THSD4    | -1.02 | 5.41E-09 | BRCA |
| THSD7A   | -1.04 | 1.43E-13 | BRCA |
| THSD7B   | -1.25 | 7.84E-11 | BRCA |
| TIMP4    | -1.18 | 1.44E-05 | BRCA |
| TLL1     | -1.17 | 1.73E-13 | BRCA |
| TMC5     | -1.78 | 5.29E-09 | BRCA |
| TMEM132C | -1.01 | 1.40E-03 | BRCA |
| TMTC1    | -1.12 | 1.20E-09 | BRCA |
| TNIK     | -1.05 | 3.26E-11 | BRCA |
| TNNI3K   | -1.05 | 7.90E-10 | BRCA |
| TOX3     | -1.21 | 8.13E-06 | BRCA |
| TP63     | -1.01 | 9.09E-05 | BRCA |
| TPRG1    | -1.19 | 9.57E-06 | BRCA |
| TRIM58   | -1.02 | 3.72E-06 | BRCA |
| TSHZ2    | -1.23 | 1.68E-12 | BRCA |
| TTBK2    | -1.14 | 1.05E-22 | BRCA |
| TUSC5    | -1.68 | 3.39E-05 | BRCA |
| UGCG     | -1.12 | 1.49E-13 | BRCA |
| UHMK1    | -1.20 | 1.53E-14 | BRCA |
| UNC5C    | -1.10 | 6.91E-12 | BRCA |
| VWA2     | -1.23 | 2.57E-07 | BRCA |
| WDR65    | -1.29 | 1.11E-11 | BRCA |
| ZBTB16   | -1.38 | 4.43E-07 | BRCA |
| ZFHX4    | -1.05 | 8.77E-14 | BRCA |
| ZNF192   | -1.13 | 6.82E-16 | BRCA |
| ZNF214   | -1.14 | 4.85E-14 | BRCA |
| ZNF354C  | -1.34 | 1.28E-18 | BRCA |
| ZNF366   | -1.15 | 1.86E-15 | BRCA |
| ZNF676   | -1.24 | 7.01E-09 | BRCA |
| ZNF699   | -1.16 | 7.90E-20 | BRCA |
| ZNF727   | -1.07 | 6.75E-08 | BRCA |

Gene: gene name

LogFC AA vs EA;  $\text{Log}_2 \left( \frac{\text{mean EA tumor RPKM}}{\text{mean AA tumor RPKM}} \right)$  for each transcript

adj.P.Val: P value adjusted for multiple hypothesis testing with BH method

Tumor: CESC = cervix, UCEC = uterine endometrial carcinoma, OV = ovary, BRCA = breast
