# Supplementary material
Source: PubMed Central journal article supplement (PMC9973425)
Supplement: crc-21-0018-s03.pdf [file crc-21-0018-s03.pdf]

**Supplemental Table 3**

| <b>Name</b>                                                             | <b>Size</b> | <b>NES</b> | <b>FDR q-val</b> | <b>AA vs EA</b> |
|-------------------------------------------------------------------------|-------------|------------|------------------|-----------------|
| HALLMARK TARGETS E2F                                                    | 193         | 2.81       | <0.010           | Upregulated     |
| KEGG RIBOSOME                                                           | 83          | 2.74       | <0.010           | Upregulated     |
| GO RRNA METABOLIC PROCESS                                               | 239         | 2.73       | <0.010           | Upregulated     |
| REACTOME PEPTIDE CHAIN ELONGATION                                       | 82          | 2.72       | <0.010           | Upregulated     |
| GO ANAPHASE PROMOTING COMPLEX DEPENDENT CATABOLIC PROCESS               | 75          | 2.70       | <0.010           | Upregulated     |
| REACTOME TRANSLATION                                                    | 143         | 2.70       | <0.010           | Upregulated     |
| REACTOME REPLICATION DNA                                                | 179         | 2.69       | <0.010           | Upregulated     |
| REACTOME NONSENSE MEDIATED DECA Y ENHANCED BY THE EXON COMPLEX JUNCTION | 101         | 2.69       | <0.010           | Upregulated     |

|                                                                                  |     |      |        |             |
|----------------------------------------------------------------------------------|-----|------|--------|-------------|
| REACTOME SRP<br>DEPENDENT<br>COTRANSLATIONAL<br>PROTEIN TARGETING TO<br>MEMBRANE | 106 | 2.69 | <0.010 | Upregulated |
| REACTOME INFLUENZA<br>VIRAL RNA<br>TRANSCRIPTION AND<br>REPLICATION              | 98  | 2.68 | <0.010 | Upregulated |
| GO NCRNA PROCESSING                                                              | 365 | 2.63 | <0.010 | Upregulated |
| REACTOME CELL CYCLE                                                              | 355 | 2.62 | <0.010 | Upregulated |
| REACTOME 3 UTR<br>MEDIATED<br>TRANSLATIONAL<br>REGULATION                        | 102 | 2.58 | <0.010 | Upregulated |
| GO RIBONUCLEOPROTEIN<br>COMPLEX BIOGENESIS                                       | 408 | 2.58 | <0.010 | Upregulated |
| GO OXIDATIVE<br>PHOSPHORYLATION                                                  | 82  | 2.57 | <0.010 | Upregulated |

|                                           |                          |     |        |        |               |
|-------------------------------------------|--------------------------|-----|--------|--------|---------------|
| HALLMARK TARGETS V1                       | MYC                      | 195 | 2.56   | <0.010 | Upregulated   |
| REACTOME OF DNA                           | SYNTHESIS                | 83  | 2.55   | <0.010 | Upregulated   |
| GO ELONGATION                             | TRANSLATIONAL            | 110 | 2.53   | <0.010 | Upregulated   |
| GO ADHESION VIA PLASMA MEMBRANE MOLECULES | HOMOPHILIC CELL ADHESION | 108 | - 2.71 | <0.010 | Downregulated |
| HALLMARK RESPONSE DN                      | UV                       | 143 | - 2.61 | <0.010 | Downregulated |
| ATATGCA                                   | MIR448                   | 191 | - 2.46 | <0.010 | Downregulated |
| TGCTTTG                                   | MIR330                   | 279 | - 2.42 | <0.010 | Downregulated |
| CTTGTAT                                   | MIR381                   | 192 | - 2.36 | <0.010 | Downregulated |
| GO CONDUCTION                             | CARDIAC                  | 63  | - 2.36 | <0.010 | Downregulated |
| TAATAAT                                   | MIR126                   | 188 | - 2.35 | <0.010 | Downregulated |

|                                                          |     |           |        |               |
|----------------------------------------------------------|-----|-----------|--------|---------------|
| GO REGULATION OF BLOOD CIRCULATION                       | 202 | -<br>2.33 | <0.010 | Downregulated |
| TGAATGT MIR181A<br>MIR181B MIR181C<br>MIR181D            | 433 | -<br>2.33 | <0.010 | Downregulated |
| GO REGULATION OF HEART CONTRACTION                       | 153 | -<br>2.33 | <0.010 | Downregulated |
| GO MULTICELLULAR ORGANISMAL SIGNALING                    | 88  | -<br>2.31 | <0.010 | Downregulated |
| CATTTCA MIR203                                           | 259 | -<br>2.28 | <0.010 | Downregulated |
| TTGCACT MIR130A<br>MIR301 MIR130B                        | 369 | -<br>2.28 | <0.010 | Downregulated |
| GO REGULATION OF PHOSPHATIDYLINOSITOL 3 KINASE SIGNALING | 110 | -<br>2.28 | <0.010 | Downregulated |

|                                                             |     |           |        |               |
|-------------------------------------------------------------|-----|-----------|--------|---------------|
| GO MEMBRANE<br>DEPOLARIZATION<br>DURING ACTION<br>POTENTIAL | 26  | -<br>2.27 | <0.010 | Downregulated |
| TAGCTTT MIR9                                                | 211 | -<br>2.27 | <0.010 | Downregulated |
| AAGCACA MIR218                                              | 347 | -<br>2.26 | <0.010 | Downregulated |

Name: Gene set name

Size: number of genes in set

NES: Normalized enrichment score

FDR q-val: q value corrected for multiple hypothesis testing

AA vs EA: direction of change in gene set representation in AA tumors as compared to EA tumors
