# Supplementary material
Source: PubMed Central journal article supplement (PMC9973425)
Supplement: crc-21-0018-s04.pdf [file crc-21-0018-s04.pdf]

**Supplemental Table 4**

| <b>micro RNA</b>               | <b>logFC</b> | <b>adj.P.Val</b> |
|--------------------------------|--------------|------------------|
| hsa-let-7b-3p MIMAT0004482     | -1.13        | 5.53E-26         |
| hsa-let-7d-3p MIMAT0004484     | -0.97        | 3.80E-14         |
| hsa-miR-328-3p MIMAT0000752    | -0.96        | 8.61E-16         |
| hsa-miR-675-3p MIMAT0006790    | -0.90        | 1.20E-09         |
| hsa-miR-127-3p MIMAT0000446    | -0.86        | 1.03E-12         |
| hsa-miR-149-5p MIMAT0000450    | -0.81        | 2.47E-11         |
| hsa-let-7c-5p MIMAT0000064     | -0.80        | 1.17E-12         |
| hsa-miR-99b-5p MIMAT0000689    | -0.80        | 1.16E-16         |
| hsa-miR-92b-3p MIMAT0003218    | -0.79        | 1.29E-08         |
| hsa-miR-378a-5p MIMAT0000731   | -0.78        | 1.09E-10         |
| hsa-miR-107 MIMAT0000104       | -0.78        | 7.41E-08         |
| hsa-miR-146b-3p MIMAT0004766   | -0.76        | 2.00E-10         |
| hsa-let-7e-3p MIMAT0004485     | -0.76        | 7.92E-13         |
| hsa-let-7b-5p MIMAT0000063     | -0.74        | 3.20E-18         |
| hsa-miR-197-3p MIMAT0000227    | -0.72        | 1.20E-09         |
| hsa-miR-125b-5p MIMAT0000423   | -0.72        | 5.21E-16         |
| hsa-miR-125b-2-3p MIMAT0004603 | -0.71        | 7.95E-09         |
| hsa-miR-134-5p MIMAT0000447    | -0.69        | 1.97E-13         |
| hsa-miR-744-5p MIMAT0004945    | -0.67        | 2.42E-13         |
| hsa-miR-574-3p MIMAT0003239    | -0.66        | 2.36E-17         |
| hsa-miR-324-3p MIMAT0000762    | -0.65        | 3.47E-12         |
| hsa-miR-205-5p MIMAT0000266    | -0.63        | 7.28E-04         |
| hsa-miR-125a-5p MIMAT0000443   | -0.63        | 1.01E-13         |
| hsa-miR-532-3p MIMAT0004780    | -0.63        | 5.18E-08         |
| hsa-miR-331-3p MIMAT0000760    | -0.61        | 1.13E-17         |
| hsa-miR-99b-3p MIMAT0004678    | -0.57        | 7.41E-08         |
| hsa-miR-654-3p MIMAT0004814    | -0.54        | 1.25E-09         |
| hsa-miR-625-3p MIMAT0004808    | -0.54        | 1.30E-07         |
| hsa-miR-200b-5p MIMAT0004571   | -0.54        | 1.01E-07         |
| hsa-miR-193a-5p MIMAT0004614   | -0.52        | 1.84E-08         |
| hsa-miR-874-3p MIMAT0004911    | -0.52        | 2.08E-09         |
| hsa-miR-486-5p MIMAT0002177    | -0.52        | 9.88E-05         |
| hsa-miR-501-3p MIMAT0004774    | -0.52        | 1.03E-07         |
| hsa-let-7i-3p MIMAT0004585     | -0.51        | 7.32E-12         |
| hsa-miR-652-3p MIMAT0003322    | -0.51        | 9.81E-09         |

|                              |      |          |
|------------------------------|------|----------|
| hsa-miR-194-5p MIMAT0000460  | 0.53 | 1.03E-07 |
| hsa-miR-93-5p MIMAT0000093   | 0.53 | 3.27E-20 |
| hsa-miR-28-5p MIMAT0000085   | 0.54 | 4.42E-14 |
| hsa-miR-103a-3p MIMAT0000101 | 0.54 | 3.02E-21 |
| hsa-miR-16-5p MIMAT0000069   | 0.55 | 7.68E-09 |
| hsa-let-7f-5p MIMAT0000067   | 0.56 | 4.34E-09 |
| hsa-miR-181a-3p MIMAT0000270 | 0.61 | 1.06E-12 |
| hsa-miR-452-5p MIMAT0001635  | 0.64 | 1.72E-06 |
| hsa-miR-30b-5p MIMAT0000420  | 0.64 | 4.99E-10 |
| hsa-miR-22-3p MIMAT0000077   | 0.66 | 5.47E-10 |
| hsa-miR-218-5p MIMAT0000275  | 0.67 | 7.68E-09 |
| hsa-miR-182-5p MIMAT0000259  | 0.67 | 8.45E-08 |
| hsa-miR-148a-3p MIMAT0000243 | 0.67 | 4.74E-07 |
| hsa-miR-98-5p MIMAT0000096   | 0.70 | 1.92E-13 |
| hsa-let-7a-3p MIMAT0004481   | 0.73 | 2.46E-09 |
| hsa-miR-196b-5p MIMAT0001080 | 0.75 | 2.19E-04 |
| hsa-miR-141-5p MIMAT0004598  | 0.78 | 1.12E-10 |
| hsa-miR-17-3p MIMAT0000071   | 0.80 | 2.56E-31 |
| hsa-miR-374b-5p MIMAT0004955 | 0.81 | 1.37E-15 |
| hsa-miR-185-5p MIMAT0000455  | 0.82 | 7.58E-22 |
| hsa-miR-199b-5p MIMAT0000263 | 0.84 | 6.98E-07 |
| hsa-miR-451a MIMAT0001631    | 0.85 | 4.04E-09 |
| hsa-miR-424-5p MIMAT0001341  | 0.87 | 6.25E-07 |
| hsa-miR-17-5p MIMAT0000070   | 0.88 | 3.42E-24 |
| hsa-miR-30a-5p MIMAT0000087  | 0.90 | 1.16E-11 |
| hsa-miR-582-3p MIMAT0004797  | 0.90 | 1.31E-07 |
| hsa-miR-126-3p MIMAT0000445  | 0.92 | 3.38E-11 |
| hsa-miR-140-5p MIMAT0000431  | 0.95 | 1.12E-12 |
| hsa-miR-200a-3p MIMAT0000682 | 1.01 | 1.04E-14 |
| hsa-miR-30e-5p MIMAT0000692  | 1.02 | 2.67E-14 |
| hsa-miR-15a-5p MIMAT0000068  | 1.04 | 2.81E-19 |
| hsa-miR-106b-5p MIMAT0000680 | 1.07 | 4.64E-21 |
| hsa-miR-708-3p MIMAT0004927  | 1.12 | 1.53E-12 |
| hsa-miR-29c-3p MIMAT0000681  | 1.13 | 5.62E-13 |
| hsa-miR-429 MIMAT0001536     | 1.18 | 7.96E-13 |
| hsa-miR-338-3p MIMAT0000763  | 1.23 | 1.16E-16 |
| hsa-miR-142-5p MIMAT0000433  | 1.26 | 7.41E-12 |
| hsa-miR-660-5p MIMAT0003338  | 1.28 | 1.88E-32 |

|                              |      |          |
|------------------------------|------|----------|
| hsa-miR-374a-5p MIMAT0000727 | 1.32 | 1.36E-17 |
| hsa-miR-2355-5p MIMAT0016895 | 1.33 | 2.13E-14 |
| hsa-miR-126-5p MIMAT0000444  | 1.37 | 5.23E-12 |
| hsa-miR-32-5p MIMAT0000090   | 1.38 | 3.69E-18 |
| hsa-miR-101-3p MIMAT0000099  | 1.39 | 7.03E-13 |
| hsa-miR-21-5p MIMAT0000076   | 1.42 | 1.03E-14 |
| hsa-miR-141-3p MIMAT0000432  | 1.43 | 2.09E-17 |
| hsa-miR-29b-3p MIMAT0000100  | 1.44 | 1.72E-15 |
| hsa-miR-542-3p MIMAT0003389  | 1.50 | 1.62E-13 |
| hsa-miR-20a-5p MIMAT0000075  | 1.58 | 9.31E-33 |
| hsa-miR-142-3p MIMAT0000434  | 1.63 | 3.67E-10 |
| hsa-miR-9-5p MIMAT0000441    | 1.65 | 3.70E-14 |
| hsa-miR-19b-3p MIMAT0000074  | 1.83 | 3.44E-19 |
| hsa-miR-374a-3p MIMAT0004688 | 2.13 | 1.05E-18 |

MicroRNA: full microRNA name

LogFC AA vs EA;  $\text{Log}_2 \left( \frac{\text{mean EA tumor RPKM}}{\text{mean AA tumor RPKM}} \right)$  for each miR

adj.P.Val: P value adjusted for multiple hypothesis testing with BH method
