# Supplementary material
Source: PubMed Central journal article supplement (PMC9973425)
Supplement: crc-21-0018-s05.pdf [file crc-21-0018-s05.pdf]

**Supplementary Table 5**

| Name       | Islands Name             | Relation to Island | UCSC RefGene Name         | UCSC RefGene Accession             | UCSC RefGene Group  | adj.P.Val | ΔBeta |
|------------|--------------------------|--------------------|---------------------------|------------------------------------|---------------------|-----------|-------|
| cg26131019 | chr3:66550318-66551848   | Island             | LRIG1                     | NM015541                           | 1stExon             | 6.22E-167 | -0.22 |
| cg08634464 | chr19:2900329-2901203    | Island             | ZNF57                     | NM173480                           | Body                | 3.87E-38  | -0.33 |
| cg09039163 | chr2:239009072-239009361 | N Shore            | ESPNL;ESPNL               | NM194312; NM194312                 | 1stExon; 5'UTR      | 3.12E-25  | -0.12 |
| cg22730830 | chr16:2867245-2868002    | Island             | PRSS21; PRSS21; PRSS21    | NM144956; NM006799; NM144957       | Body;Body;Body      | 4.61E-22  | 0.23  |
| cg26987645 |                          | OpenSea            | FMOD                      | NM002023                           | TSS200              | 3.85E-21  | 0.12  |
| cg17518825 | chr2:46523789-46527140   | N Shore            | EPAS1                     | NM001430                           | TSS1500             | 1.31E-20  | -0.13 |
| cg14417329 | chr17:80186135-80189990  | Island             | SLC16A3; SLC16A3          | NM001042422; NM004207              | TSS200; TSS1500     | 2.04E-17  | -0.12 |
| cg01333788 |                          | OpenSea            | GJB5                      | NM005268                           | 5'UTR               | 3.12E-17  | -0.11 |
| cg17904739 | chr12:3862068-3862606    | N Shore            | EFCAB4B; EFCAB4B; EFCAB4B | NM001144959; NM032680; NM001144958 | 5'UTR; 5'UTR; 5'UTR | 4.70E-16  | 0.17  |
| cg23817637 |                          | OpenSea            | CLRN3                     | NM152311                           | TSS1500             | 5.56E-16  | -0.13 |
| cg12854483 |                          | OpenSea            | CNN1; CNN1                | NM001299; NM001299                 | 1stExon; 5'UTR      | 1.30E-11  | 0.14  |
| cg02022375 |                          | OpenSea            | KRTAP1-1                  | NM030967                           | TSS200              | 1.38E-11  | -0.12 |
| cg05342835 |                          | OpenSea            | SYNC; SYNC                | NM030786;                          | Body;Body           | 1.60E-11  | 0.14  |

|                |                                      |         |                                                        |                                                                                                                                          |                                                    |          |       |
|----------------|--------------------------------------|---------|--------------------------------------------------------|------------------------------------------------------------------------------------------------------------------------------------------|----------------------------------------------------|----------|-------|
|                |                                      |         |                                                        | NM<br>0011617<br>08                                                                                                                      |                                                    |          |       |
| cg22487<br>322 | chr6:137<br>365299-<br>1373661<br>26 | S Shore | IL20RA                                                 | NM<br>014432                                                                                                                             | TSS200                                             | 8.21E-10 | 0.13  |
| cg15873<br>301 | chr3:120<br>45652-<br>1204662<br>7   | N Shore | SYN2;SY<br>N2                                          | NM<br>133625;<br>NM<br>003178                                                                                                            | TSS1500<br>;TSS150<br>0                            | 1.18E-08 | -0.19 |
| cg24512<br>973 | chr1:155<br>163434-<br>1551638<br>18 | N Shore | MUC1;M<br>UC1;MU<br>C1;MUC<br>1;MUC1;<br>MUC1;M<br>UC1 | NM<br>0010443<br>91;NM<br>0010443<br>93;NM<br>0010180<br>16;NM<br>0010443<br>90;NM<br>0010443<br>92;NM<br>002456;<br>NM<br>0010180<br>17 | Body;Bo<br>dy;Body;<br>Body;Bo<br>dy;Body;<br>Body | 2.93E-08 | 0.15  |
| cg16731<br>240 | chr19:52<br>390841-<br>5239136<br>8  | Island  | ZNF577;<br>ZNF577;<br>ZNF577                           | NR<br>024181;<br>NM<br>032679;<br>NM<br>0011355<br>90                                                                                    | TSS200;<br>TSS200;<br>TSS200                       | 6.36E-08 | 0.15  |
| cg18182<br>399 | chr2:220<br>283200-<br>2202837<br>50 | N Shore | DES;DE<br>S                                            | NM<br>001927;<br>NM<br>001927                                                                                                            | 1stExon;<br>5'UTR                                  | 2.36E-07 | 0.27  |
| cg18738<br>906 |                                      | OpenSea | SCNN1A<br>;SCNN1<br>A;SCNN<br>1A                       | NM<br>0011595<br>75;NM<br>001038;<br>NM<br>0011595<br>76                                                                                 | Body;Bo<br>dy;1stEx<br>on                          | 4.30E-07 | 0.20  |
| cg22506<br>059 | chr22:37<br>914768-<br>3791588<br>3  | S Shore | CARD10                                                 | NM<br>014550                                                                                                                             | TSS1500                                            | 1.04E-06 | 0.14  |
| cg06818<br>777 | chr17:48<br>545570-<br>4854690<br>0  | Island  | CHAD;A<br>CSF2                                         | NM<br>001267;<br>NM<br>025149                                                                                                            | TSS1500<br>;Body                                   | 3.94E-05 | 0.12  |

|            |                          |         |                                                                 |                                               |                                                                 |          |       |
|------------|--------------------------|---------|-----------------------------------------------------------------|-----------------------------------------------|-----------------------------------------------------------------|----------|-------|
| cg06958829 | chr17:48545570-48546900  | Island  | ACSF2;CHAD                                                      | NM025149;NM001267                             | Body;1st Exon                                                   | 4.58E-05 | 0.24  |
| cg15158783 | chr4:74847528-74847830   | Island  | PF4                                                             | NM002619                                      | 1stExon                                                         | 5.24E-05 | 0.13  |
| cg00333528 |                          | OpenSea | GABRR1;GABRR1                                                   | NM002042;NM002042                             | 5'UTR;1stExon                                                   | 5.62E-05 | 0.12  |
| cg01081263 | chr11:9112461-9113459    | Island  | SCUBE2;SCUBE2                                                   | NM020974;NM001170690                          | Body;Body                                                       | 7.14E-05 | 0.12  |
| cg27278294 | chrX:149736720-149737756 | N Shore | MTM1                                                            | NM000252                                      | TSS1500                                                         | 7.38E-05 | -0.10 |
| cg19884600 |                          | OpenSea | PYHIN1;PYHIN1;PYHIN1;PYHIN1                                     | NM198930;NM198928;NM198929;NM152501           | 5'UTR;5'UTR;5'UTR;5'UTR                                         | 2.72E-04 | -0.11 |
| cg14925024 | chr1:228289669-228291184 | S Shore | C1orf35                                                         | NM024319                                      | TSS1500                                                         | 2.94E-04 | -0.12 |
| cg08899626 |                          | OpenSea | LDB2;LDB2;LDB2;LDB2                                             | NM001290;NM001130834;NM001130834;NM001290     | 1stExon;1stExon;5'UTR;5'UTR                                     | 5.63E-04 | 0.11  |
| cg25593948 | chr6:50787286-50788091   | N Shore | TFAP2B                                                          | NM003221                                      | 1stExon                                                         | 7.69E-04 | 0.10  |
| cg05942574 | chr17:48636103-48639279  | Island  | CACNA1G;CACNA1G;CACNA1G;CACNA1G;CACNA1G;CACNA1G;CACNA1G;CACNA1G | NM198384;NM198397;NM198396;NM198379;NM198383; | TSS1500;TSS1500;TSS1500;TSS1500;TSS1500;TSS1500;TSS1500;TSS1500 | 7.96E-04 | 0.13  |

|                |                                       |         |                                                                                                 |                                                                                                                                                                       |                                                                           |          |       |
|----------------|---------------------------------------|---------|-------------------------------------------------------------------------------------------------|-----------------------------------------------------------------------------------------------------------------------------------------------------------------------|---------------------------------------------------------------------------|----------|-------|
|                |                                       |         | A1G;CA<br>CNA1G;<br>CACNA1<br>G;CACN<br>A1G;CA<br>CNA1G;<br>CACNA1<br>G;CACN<br>A1G;CA<br>CNA1G | NM<br>198380;<br>NM<br>198387;<br>NM<br>198378;<br>NM<br>198377;<br>NM<br>198386;<br>NM<br>198376;<br>NM<br>198385;<br>NM<br>018896;<br>NM<br>198388;<br>NM<br>198382 | 0;TSS15<br>00;TSS1<br>500;TSS<br>1500;TS<br>S1500;T<br>SS1500;<br>TSS1500 |          |       |
| cg16415<br>058 | chr10:10<br>8923780-<br>1089248<br>05 | Island  | SORCS1<br>;SORCS<br>1                                                                           | NM<br>0010130<br>31;NM<br>052918                                                                                                                                      | 1stExon;<br>1stExon                                                       | 8.34E-04 | 0.19  |
| cg20773<br>127 | chr4:111<br>397677-<br>1113980<br>89  | N Shore | ENPEP                                                                                           | NM<br>001977                                                                                                                                                          | TSS200                                                                    | 8.40E-04 | 0.11  |
| cg10014<br>293 | chr16:56<br>701863-<br>5670220<br>8   | S Shore | MT1H                                                                                            | NM<br>005951                                                                                                                                                          | Body                                                                      | 9.56E-04 | 0.12  |
| cg22605<br>643 |                                       | OpenSea | RGS4;R<br>GS4;RG<br>S4;RGS4                                                                     | NM<br>005613;<br>NM<br>0011024<br>45;NM<br>0011133<br>81;NM<br>005613                                                                                                 | 1stExon;<br>Body;TS<br>S200;5'U<br>TR                                     | 1.10E-03 | 0.10  |
| cg03760<br>483 | chr17:68<br>98820-<br>6900427         | Island  | ALOX12                                                                                          | NM<br>000697                                                                                                                                                          | TSS200                                                                    | 1.26E-03 | 0.12  |
| cg10925<br>082 |                                       | OpenSea | ARHGDI<br>B                                                                                     | NM<br>001175                                                                                                                                                          | TSS200                                                                    | 1.52E-03 | 0.11  |
| cg17142<br>183 |                                       | OpenSea | IL1R2                                                                                           | NM<br>004633                                                                                                                                                          | TSS200                                                                    | 1.61E-03 | -0.11 |
| cg25438<br>963 | chr6:260<br>45644-<br>2604603<br>3    | Island  | HIST1H3<br>C                                                                                    | NM<br>003531                                                                                                                                                          | 1stExon                                                                   | 3.08E-03 | 0.26  |
| cg15799<br>267 |                                       | OpenSea | ALOX15<br>B;ALOX<br>15B;ALOX                                                                    | NM<br>001141;<br>NM                                                                                                                                                   | 5'UTR;5'<br>UTR;1st<br>Exon;5'U                                           | 3.76E-03 | 0.11  |

|            |                           |         |                             |                                                        |                        |          |      |
|------------|---------------------------|---------|-----------------------------|--------------------------------------------------------|------------------------|----------|------|
|            |                           |         | 15B;ALOX15B;ALOX15B;ALOX15B | 001039130;NM001039131;NM001039131;NM001141;NM001039130 | TR;1stExon;1stExon     |          |      |
| cg09137696 | chr16:56671937-56672530   | Island  | MT1A                        | NM005946                                               | TSS200                 | 4.59E-03 | 0.17 |
| cg21922574 | chr18:70533965-70536871   | Island  | NETO1                       | NM138966                                               | TSS1500                | 8.03E-03 | 0.17 |
| cg07636178 | chr6:26045644-26046033    | N Shore | HIST1H3C                    | NM003531                                               | TSS200                 | 9.43E-03 | 0.11 |
| cg09313705 | chr17:46620367-46621373   | S Shore | HOXB2                       | NM002145                                               | TSS200                 | 9.58E-03 | 0.12 |
| cg03573747 |                           | OpenSea | ADIPOQ                      | NM004797                                               | 5'UTR                  | 1.18E-02 | 0.11 |
| cg09980522 | chr11:105481126-105481422 | S Shore | GRIA4;GRIA4;GRIA4;GRIA4     | NM001077243;NM001077244;NM001112812;NM000829           | Body;Body;1stExon;Body | 1.34E-02 | 0.14 |
| cg02916816 | chr14:24044886-24046760   | S Shore | JPH4;JPH4                   | NM001146028;NM032452                                   | 5'UTR;5'UTR            | 1.39E-02 | 0.14 |
| cg20449692 | chr3:170136242-170137886  | Island  | CLDN11                      | NM005602                                               | 1stExon                | 1.43E-02 | 0.12 |
| cg11762346 |                           | OpenSea | HKDC1;HKDC1                 | NM025130;NM025130                                      | 5'UTR;1stExon          | 1.72E-02 | 0.18 |
| cg15740508 |                           | OpenSea | AMPD1                       | NM000036                                               | TSS1500                | 1.84E-02 | 0.16 |
| cg26029902 | chr20:56884738-56885222   | N Shore | RAB22A;PPP4R1L              | NM020673;NR003505                                      | TSS1500;Body           | 1.89E-02 | 0.13 |

|            |                          |         |                                                       |                                                                   |                                         |          |      |
|------------|--------------------------|---------|-------------------------------------------------------|-------------------------------------------------------------------|-----------------------------------------|----------|------|
| cg25239996 | chr20:44746822-44747060  | N Shore | CD40;CD40                                             | NM152854;NM001250                                                 | TSS200;TSS200                           | 1.97E-02 | 0.12 |
| cg23995753 | chr2:160760604-160761452 | Island  | LY75                                                  | NM002349                                                          | Body                                    | 2.01E-02 | 0.15 |
| cg12100791 | chr16:31213566-31214287  | S Shore | PYCARD;PYCARD                                         | NM013258;NM145182                                                 | TSS200;TSS200                           | 2.02E-02 | 0.10 |
| cg08124030 |                          | OpenSea | TM4SF1                                                | NM014220                                                          | 1stExon                                 | 2.14E-02 | 0.10 |
| cg21880903 |                          | OpenSea | KLB                                                   | NM175737                                                          | 1stExon                                 | 2.19E-02 | 0.14 |
| cg19994834 | chrX:122318752-122319149 | N Shore | GRIA3;GRIA3                                           | NM007325;NM000828                                                 | TSS200;TSS200                           | 2.33E-02 | 0.10 |
| cg01058368 |                          | OpenSea | CDH10                                                 | NM006727                                                          | TSS1500                                 | 2.83E-02 | 0.11 |
| cg26385222 | chr7:150496809-150498206 | Island  | TMEM176B;TMEM176B;TMEM176A;TMEM176B;TMEM176B;TMEM176B | NM001101313;NM001101311;NM018487;NM014020;NM001101312;NM001101314 | TSS1500;5'UTR;TSS1500;5'UTR;5'UTR;5'UTR | 3.24E-02 | 0.10 |
| cg00891278 | chr3:126113547-126113967 | Island  | CCDC37;CCDC37                                         | NM182628;NM182628                                                 | 1stExon;5'UTR                           | 3.73E-02 | 0.13 |
| cg15077070 | chr2:102803672-102804556 | N Shore | IL1RL2                                                | NM003854                                                          | TSS200                                  | 4.53E-02 | 0.11 |

Name: DNA methylation probe name

Relations to Island: position of methylation probe relative to nearest island

UCSC RefGene Name

UCSC RefGene Accession number

UCSC RefGeneGroup: Assigned DNA loci per UCSC designation

adj.P.Val: P-value adjusted for multiple hypothesis testing

$\Delta$  Beta: Difference in mean beta methylation level (EA – AA)
