# Supplementary material
Source: PubMed Central journal article supplement (PMC9973425)
Supplement: crc-21-0018-s06.pdf [file crc-21-0018-s06.pdf]

**Supplementary Table 6**

| chr       | pos           | strand | Name       | UCSC RefGene Name    | adj.P.Val | ΔBeta | Tumor |
|-----------|---------------|--------|------------|----------------------|-----------|-------|-------|
| chrX      | 15130<br>6718 | +      | cg04950711 | MAGEA10;MAGEA10      | 0.02      | -0.29 | OV    |
| chr7      | 10054<br>4704 | -      | cg00644033 |                      | 0.01      | -0.28 | OV    |
| chrX      | 52840<br>736  | -      | cg25993152 | XAGE5                | 0.02      | -0.27 | OV    |
| chr1<br>0 | 44881<br>551  | +      | cg00499822 | CXCL12;CXCL12;CXCL12 | 0.00      | -0.21 | OV    |
| chr1<br>9 | 29011<br>47   | -      | cg08634464 | ZNF57                | 0.01      | -0.20 | OV    |
| chr6      | 41130<br>718  | +      | cg20095587 | TREM2                | 0.05      | -0.19 | OV    |
| chr9      | 11790<br>5075 | +      | cg04761824 | 1-Dec                | 0.01      | -0.18 | OV    |
| chr1<br>9 | 42260<br>485  | -      | cg26813458 | CEACAM6              | 0.02      | -0.17 | OV    |
| chr7      | 99573<br>278  | +      | cg19465374 | AZGP1                | 0.03      | -0.17 | OV    |
| chrX      | 15130<br>7053 | -      | cg19964192 | MAGEA10;MAGEA10      | 0.00      | -0.16 | OV    |
| chr1<br>4 | 96152<br>109  | +      | cg27504299 | TCL1B;TCL1B          | 0.02      | -0.16 | OV    |
| chr2<br>0 | 57427<br>830  | +      | cg17414107 | GNAS;GNAS;GNAS       | 0.02      | -0.16 | OV    |
| chr1      | 15925<br>8877 | -      | cg14696870 | FCER1A               | 0.04      | -0.16 | OV    |
| chr1<br>9 | 15123<br>14   | -      | cg04601137 | ADAMTSL5             | 0.02      | -0.15 | OV    |
| chr5      | 54281<br>336  | -      | cg20451680 | ESM1;ESM1            | 0.03      | -0.15 | OV    |
| chr4      | 69111<br>580  | +      | cg19510180 | TMPRSS11B            | 0.02      | -0.15 | OV    |
| chr6      | 32731<br>327  | -      | cg04345908 | HLA-DQB2             | 0.03      | -0.15 | OV    |
| chr2      | 95537<br>475  | -      | cg05723825 | TEKT4                | 0.00      | -0.15 | OV    |
| chrX      | 11837<br>0356 | -      | cg07876586 | PGRMC1               | 0.00      | -0.15 | OV    |
| chr2<br>0 | 57427<br>738  | +      | cg27661264 | GNAS;GNAS;GNAS       | 0.03      | -0.14 | OV    |
| chr3      | 66550<br>735  | +      | cg26131019 | LRIG1                | 0.00      | -0.14 | OV    |
| chr6      | 11001<br>1156 | -      | cg01500097 | AKD1;FIG4;AKD1       | 0.05      | -0.13 | OV    |
| chr1<br>7 | 39197<br>721  | -      | cg02022375 | KRTAP1-1             | 0.01      | -0.13 | OV    |
| chr1<br>1 | 55703<br>443  | -      | cg25890048 | OR511                | 0.01      | -0.12 | OV    |
| chr1<br>9 | 10736<br>038  | -      | cg17826679 | SLC44A2;SLC44A2      | 0.03      | -0.12 | OV    |

|           |               |   |                |                                     |          |       |      |
|-----------|---------------|---|----------------|-------------------------------------|----------|-------|------|
| chr6      | 10976<br>0831 | + | cg20811607     | PPIL6;PPIL6;S<br>MPD2               | 0.01     | -0.11 | OV   |
| chr1      | 20305<br>9178 | - | cg13626881     |                                     | 0.04     | -0.11 | OV   |
| chr2<br>1 | 45705<br>686  | - | cg17356252     | AIRE                                | 0.02     | -0.11 | OV   |
| chrX      | 10074<br>0937 | + | cg14457691     | ARMCX4                              | 0.05     | -0.10 | OV   |
| chr1      | 35220<br>814  | - | cg01333788     | GJB5                                | 0.02     | -0.10 | OV   |
| chr2      | 23900<br>9036 | - | cg09039163     | ESPNL;ESPNL                         | 0.02     | -0.10 | OV   |
| chrX      | 69487<br>197  | - | cg11494656     | ARR3                                | 0.04     | -0.10 | OV   |
| chrX      | 41783<br>155  | - | cg16269097     | CASK;CASK;C<br>ASK                  | 0.03     | -0.10 | OV   |
| chrX      | 15208<br>6723 | - | cg16022279     | ZNF185                              | 0.01     | -0.10 | OV   |
| chrX      | 15344<br>8957 | + | cg06325687     | OPN1MW2;OP<br>N1MW                  | 0.03     | -0.10 | OV   |
| chr2<br>1 | 36421<br>472  | + | cg04915566     | RUNX1;RUNX1                         | 0.01     | 0.11  | OV   |
| chr1<br>2 | 15373<br>987  | - | cg19205533     | RERG                                | 0.03     | 0.14  | OV   |
| chr1<br>1 | 85780<br>971  | + | cg01120308     | PICALM;PICAL<br>M                   | 0.03     | 0.14  | OV   |
| chr1<br>6 | 56642<br>024  | + | cg17886959     | MT2A                                | 0.01     | 0.14  | OV   |
| chr3      | 11185<br>2156 | + | cg25462303     | GCET2;GCET2                         | 0.02     | 0.14  | OV   |
| chr1      | 16303<br>9012 | - | cg22605643     | RGS4;RGS4;R<br>GS4;RGS4             | 0.04     | 0.17  | OV   |
| chr1<br>2 | 15114<br>703  | - | cg10925082     | ARHGDI                              | 0.03     | 0.20  | OV   |
| chr1<br>4 | 39735<br>211  | + | cg13277939     | CTAGE5;CTAG<br>E5;CTAGE5;CT<br>AGE5 | 0.04     | 0.23  | OV   |
| chr1<br>9 | 49249<br>932  | - | cg10234985     | IZUMO1;IZUM<br>O1                   | 0.05     | 0.26  | OV   |
| chr1<br>9 | 29011<br>47   | - | cg08634464     | ZNF57                               | 5.30E-20 | -0.34 | BRCA |
| chr1<br>1 | 65405<br>362  | - | cg25361844     | SIPA1                               | 6.79E-05 | -0.29 | BRCA |
| chr3      | 13925<br>8939 | + | cg23363832     | RBP1;RBP1;RB<br>P1                  | 1.22E-04 | -0.25 | BRCA |
| chr8      | 23083<br>353  | - | cg26530341     | TNFRSF10A                           | 5.20E-10 | -0.24 | BRCA |
| chr5      | 11869<br>1033 | - | cg07086380     | TNFAIP8;TNFA<br>IP8                 | 1.06E-08 | -0.23 | BRCA |
| chr3      | 66550<br>735  | + | Cg<br>26131019 | LRIG1                               | 4.62E-88 | -0.22 | BRCA |
| chr1<br>5 | 48936<br>953  | - | cg18671950     | FBN1                                | 2.53E-02 | -0.22 | BRCA |

|           |               |   |            |                                            |          |       |      |
|-----------|---------------|---|------------|--------------------------------------------|----------|-------|------|
| chr9      | 90113<br>813  | - | cg15746719 | DAPK1                                      | 9.82E-08 | -0.21 | BRCA |
| chr2      | 20209<br>8951 | - | cg26799474 | CASP8;CASP8;<br>CASP8;CASP8                | 5.35E-04 | -0.19 | BRCA |
| chr8      | 10979<br>9756 | + | cg15042080 | TMEM74;TME<br>M74                          | 5.17E-03 | -0.19 | BRCA |
| chr3      | 14283<br>8847 | - | cg00995327 | CHST2;CHST2                                | 2.95E-02 | -0.17 | BRCA |
| chr1<br>1 | 44330<br>903  | + | cg26365854 | ALX4                                       | 3.26E-03 | -0.16 | BRCA |
| chr1<br>7 | 33701<br>321  | - | cg18108623 | SLFN11;SLFN1<br>1;SLFN11;SLF<br>N11;SLFN11 | 3.45E-02 | -0.16 | BRCA |
| chr1<br>0 | 64575<br>798  | - | cg19355190 | EGR2;EGR2;E<br>GR2;EGR2;EG<br>R2           | 1.25E-02 | -0.16 | BRCA |
| chr1<br>6 | 14302<br>16   | - | cg11911951 | UNKL                                       | 4.38E-04 | -0.16 | BRCA |
| chr1<br>7 | 25798<br>973  | - | cg05246522 | KSR1                                       | 2.42E-02 | -0.15 | BRCA |
| chr3      | 49378<br>032  | + | cg18886444 | USP4;USP4                                  | 1.29E-05 | -0.15 | BRCA |
| chr1<br>1 | 44327<br>399  | - | cg04970352 | ALX4                                       | 1.18E-02 | -0.14 | BRCA |
| chr1<br>0 | 12969<br>1429 | + | cg23817637 | CLRN3                                      | 4.08E-17 | -0.14 | BRCA |
| chr1<br>4 | 85996<br>495  | + | cg17410236 | FLRT2;FLRT2                                | 2.44E-02 | -0.14 | BRCA |
| chr1<br>5 | 10141<br>9074 | - | cg23191950 | ALDH1A3                                    | 5.06E-06 | -0.14 | BRCA |
| chr1<br>1 | 65405<br>903  | - | cg26668713 | SIPA1                                      | 6.72E-06 | -0.14 | BRCA |
| chr4      | 48485<br>233  | - | cg19283196 | SLC10A4                                    | 3.37E-02 | -0.14 | BRCA |
| chr8      | 13377<br>2889 | + | cg20955688 | TMEM71;TME<br>M71;TMEM71;T<br>MEM71        | 3.05E-04 | -0.13 | BRCA |
| chr2<br>0 | 56286<br>697  | + | cg00138126 | PMEPA1;PMEP<br>A1;PMEPA1                   | 2.68E-04 | -0.13 | BRCA |
| chr1<br>9 | 33863<br>876  | - | cg15046693 | CEBPG                                      | 1.00E-05 | -0.13 | BRCA |
| chr1<br>0 | 82049<br>429  | + | cg19423196 | MAT1A;MAT1A                                | 4.97E-03 | -0.13 | BRCA |
| chr3      | 12045<br>459  | - | cg15873301 | SYN2;SYN2                                  | 8.05E-05 | -0.13 | BRCA |
| chr5      | 76114<br>373  | - | cg24573501 | F2RL1                                      | 2.52E-03 | -0.13 | BRCA |
| chr2      | 23900<br>9036 | - | cg09039163 | ESPNL;ESPNL                                | 5.30E-20 | -0.13 | BRCA |
| chr1<br>7 | 80186<br>273  | - | cg14417329 | SLC16A3;SLC1<br>6A3                        | 3.20E-12 | -0.13 | BRCA |
| chr7      | 49813<br>763  | - | cg00333226 | VWC2                                       | 6.08E-03 | -0.13 | BRCA |
| chr1<br>9 | 67391<br>92   | - | cg02085507 | TRIP10                                     | 1.85E-02 | -0.13 | BRCA |

|           |               |   |            |                                                         |          |       |      |
|-----------|---------------|---|------------|---------------------------------------------------------|----------|-------|------|
| chr8      | 82192<br>606  | + | cg19904463 | FABP5                                                   | 9.78E-06 | -0.13 | BRCA |
| chr1      | 25255<br>838  | + | cg00117172 | RUNX3;RUNX3                                             | 2.27E-03 | -0.13 | BRCA |
| chr8      | 12598<br>4927 | + | cg23968383 | ZNF572                                                  | 3.71E-08 | -0.13 | BRCA |
| chr9      | 36037<br>454  | + | cg12717594 | RECK                                                    | 3.69E-03 | -0.12 | BRCA |
| chr1<br>7 | 46800<br>639  | - | cg01543654 | C17orf93;PRAC                                           | 2.07E-02 | -0.12 | BRCA |
| chr2      | 46523<br>461  | - | cg17518825 | EPAS1                                                   | 2.60E-14 | -0.12 | BRCA |
| chr2      | 43019<br>614  | - | cg20289949 | HAAO                                                    | 1.52E-02 | -0.12 | BRCA |
| chr1<br>9 | 35981<br>677  | - | cg10305797 | KRTDAP                                                  | 1.77E-05 | -0.12 | BRCA |
| chr1<br>3 | 78492<br>916  | - | cg23316360 | EDNRB;EDNR<br>B;EDNRB;EDN<br>RB;EDNRB                   | 9.00E-03 | -0.12 | BRCA |
| chr1<br>4 | 76045<br>348  | + | cg04001333 | FLVCR2                                                  | 1.32E-08 | -0.12 | BRCA |
| chr1<br>8 | 28473<br>09   | + | cg09009111 | EMILIN2                                                 | 1.73E-02 | -0.12 | BRCA |
| chr1<br>7 | 27369<br>780  | + | cg06144905 | PIPOX                                                   | 6.44E-03 | -0.12 | BRCA |
| chr6      | 11079<br>7497 | + | cg22334665 | SLC22A16                                                | 4.34E-03 | -0.12 | BRCA |
| chr9      | 34263<br>021  | + | cg19947621 | KIF24                                                   | 1.77E-04 | -0.12 | BRCA |
| chr1      | 76540<br>465  | - | cg12601757 | ST6GALNAC3;<br>ST6GALNAC3;<br>ST6GALNAC3;<br>ST6GALNAC3 | 3.40E-02 | -0.12 | BRCA |
| chr9      | 90114<br>156  | - | cg24754277 | DAPK1                                                   | 6.56E-04 | -0.12 | BRCA |
| chr8      | 27850<br>178  | + | cg07634191 | SCARA5;SCAR<br>A5                                       | 1.78E-05 | -0.12 | BRCA |
| chr7      | 23510<br>648  | - | cg02860543 | IGF2BP3                                                 | 3.39E-02 | -0.11 | BRCA |
| chr3      | 13925<br>8822 | + | cg06543018 | RBP1;RBP1;RB<br>P1                                      | 9.24E-08 | -0.11 | BRCA |
| chr6      | 15177<br>2946 | - | cg00510787 | C6orf211;RMN<br>D1                                      | 2.60E-14 | -0.11 | BRCA |
| chr2      | 10830<br>764  | - | cg02196655 | NOL10                                                   | 1.42E-04 | -0.11 | BRCA |
| chr1<br>7 | 39197<br>721  | - | cg02022375 | KRTAP1-1                                                | 5.68E-08 | -0.11 | BRCA |
| chr3      | 71834<br>640  | + | cg08555612 | PROK2;PROK2                                             | 6.97E-03 | -0.11 | BRCA |
| chr1      | 15879<br>9935 | - | cg25119415 | MNDA                                                    | 6.20E-03 | -0.11 | BRCA |
| chr1<br>7 | 27944<br>585  | - | cg06038133 | CORO6                                                   | 1.79E-03 | -0.11 | BRCA |
| chr1<br>2 | 11245<br>2424 | - | cg26789453 | TMEM116;ERP<br>29;ERP29                                 | 3.34E-03 | -0.11 | BRCA |

|           |               |   |            |                                         |          |       |      |
|-----------|---------------|---|------------|-----------------------------------------|----------|-------|------|
| chr1<br>5 | 10141<br>9017 | - | cg19224278 | ALDH1A3                                 | 4.36E-04 | -0.11 | BRCA |
| chr2<br>0 | 53092<br>781  | + | cg11822659 | DOK5                                    | 4.40E-06 | -0.11 | BRCA |
| chr8      | 13377<br>2742 | + | cg27159719 | TMEM71;TME<br>M71;TMEM71;T<br>MEM71     | 2.10E-03 | -0.11 | BRCA |
| chr1<br>9 | 39687<br>963  | + | cg19917856 | NCCRP1                                  | 1.03E-02 | -0.11 | BRCA |
| chr1      | 23404<br>0833 | - | cg25437385 | SLC35F3                                 | 4.24E-02 | -0.11 | BRCA |
| chr3      | 14893<br>9523 | - | cg17439694 | CP                                      | 2.96E-11 | -0.11 | BRCA |
| chr1      | 20315<br>6246 | - | cg07423149 | CHI3L1                                  | 1.22E-02 | -0.11 | BRCA |
| chr4      | 11155<br>7894 | - | cg05522383 | PITX2;PITX2                             | 9.50E-03 | -0.11 | BRCA |
| chr1<br>2 | 75728<br>469  | - | cg21087137 | GLIPR1L1;GLIP<br>R1L1                   | 6.41E-03 | -0.10 | BRCA |
| chr1<br>7 | 10102<br>558  | - | cg13991233 | GAS7                                    | 2.30E-03 | -0.10 | BRCA |
| chr8      | 41165<br>699  | - | cg02388150 | SFRP1                                   | 6.32E-04 | -0.10 | BRCA |
| chr3      | 44902<br>933  | - | cg16615211 | MIR564;TMEM<br>42                       | 1.90E-02 | -0.10 | BRCA |
| chr1<br>7 | 66166<br>53   | - | cg16652063 | SLC13A5;SLC1<br>3A5;SLC13A5;<br>SLC13A5 | 2.89E-02 | -0.10 | BRCA |
| chr1      | 20581<br>9179 | + | cg14159672 | PM20D1                                  | 8.63E-11 | -0.10 | BRCA |
| chr1      | 17181<br>0972 | - | cg23391785 | DNM3;DNM3                               | 6.27E-04 | -0.10 | BRCA |
| chr1<br>8 | 56530<br>302  | + | cg12406559 | ZNF532;ZNF53<br>2                       | 3.21E-02 | -0.10 | BRCA |
| chr1<br>3 | 47469<br>654  | + | cg00308665 | HTR2A;HTR2A                             | 1.49E-03 | 0.10  | BRCA |
| chr1<br>9 | 66397<br>3    | + | cg03605761 | RNF126                                  | 1.39E-06 | 0.10  | BRCA |
| chr8      | 25281<br>609  | + | cg22502171 | GNRH1;GNRH<br>1;GNRH1                   | 1.98E-06 | 0.10  | BRCA |
| chr1<br>6 | 30406<br>122  | + | cg16014085 | ZNF48                                   | 2.45E-03 | 0.10  | BRCA |
| chr1<br>9 | 14920<br>43   | - | cg02674804 | REEP6                                   | 5.63E-05 | 0.10  | BRCA |
| chr3      | 12233<br>4227 | - | cg22468055 | PARP15;PARP<br>15                       | 1.65E-05 | 0.10  | BRCA |
| chr6      | 29455<br>532  | + | cg01078434 | MAS1L                                   | 3.47E-02 | 0.10  | BRCA |
| chr1<br>6 | 15527<br>940  | - | cg07977490 | C16orf45                                | 3.87E-09 | 0.10  | BRCA |
| chr4      | 26493<br>496  | - | cg04353483 | CCKAR                                   | 1.77E-02 | 0.10  | BRCA |
| chr1<br>8 | 48189<br>538  | - | cg26946769 | MAPK4                                   | 5.74E-03 | 0.10  | BRCA |

|           |               |   |            |                             |          |      |      |
|-----------|---------------|---|------------|-----------------------------|----------|------|------|
| chr1<br>8 | 63417<br>392  | + | cg04564030 | CDH7;CDH7                   | 2.87E-02 | 0.11 | BRCA |
| chr2<br>2 | 37916<br>157  | + | cg22506059 | CARD10                      | 3.19E-08 | 0.11 | BRCA |
| chr1<br>7 | 46622<br>491  | - | cg09313705 | HOXB2                       | 2.21E-04 | 0.11 | BRCA |
| chr1<br>9 | 58262<br>242  | - | cg02682905 | ZNF776                      | 6.63E-04 | 0.11 | BRCA |
| chr2<br>0 | 43935<br>361  | + | cg21835643 | MATN4;MATN4<br>;RBPJL;MATN4 | 3.59E-02 | 0.11 | BRCA |
| chr1      | 47155<br>20   | - | cg17525406 | AJAP1;AJAP1                 | 3.61E-02 | 0.11 | BRCA |
| chr2<br>0 | 44657<br>948  | + | cg22752533 | SLC12A5;SLC1<br>2A5;SLC12A5 | 1.29E-03 | 0.11 | BRCA |
| chr8      | 80523<br>461  | - | cg23326689 | STMN2                       | 4.31E-06 | 0.11 | BRCA |
| chr7      | 64126<br>140  | + | cg12856392 | ZNF107;ZNF10<br>7           | 5.26E-05 | 0.11 | BRCA |
| chr1      | 20332<br>0223 | - | cg03764585 | FMOD;FMOD                   | 3.40E-06 | 0.11 | BRCA |
| chr4      | 58950<br>98   | + | cg22680204 | CRMP1                       | 1.44E-02 | 0.11 | BRCA |
| chr1<br>7 | 66950<br>545  | - | cg21660392 | ABCA8                       | 2.92E-03 | 0.11 | BRCA |
| chr3      | 11236<br>0952 | + | cg21307628 | CCDC80;CCDC<br>80           | 2.72E-04 | 0.11 | BRCA |
| chr7      | 89840<br>731  | + | cg27626102 | STEAP2;STEA<br>P2           | 4.71E-05 | 0.11 | BRCA |
| chr5      | 24645<br>487  | - | cg01058368 | CDH10                       | 1.24E-06 | 0.11 | BRCA |
| chr3      | 18738<br>8225 | + | cg13206017 | SST                         | 1.48E-03 | 0.11 | BRCA |
| chr5      | 36301<br>436  | - | cg26511075 | RANBP3L;RAN<br>BP3L         | 2.37E-04 | 0.11 | BRCA |
| chr6      | 31088<br>188  | + | cg08424423 | CDSN;PSORS1<br>C1           | 7.08E-06 | 0.11 | BRCA |
| chr2      | 18254<br>4413 | - | cg02836529 | NEUROD1                     | 5.08E-04 | 0.11 | BRCA |
| chr2<br>0 | 15386<br>71   | - | cg25737664 | SIRPD                       | 1.89E-02 | 0.11 | BRCA |
| chr1<br>6 | 60688<br>35   | - | cg19378133 | A2BP1;A2BP1                 | 2.18E-03 | 0.11 | BRCA |
| chr1      | 15100<br>9588 | - | cg11584936 | BNIPL;BNIPL                 | 5.26E-03 | 0.11 | BRCA |
| chr1      | 15328<br>3994 | - | cg06275635 | PGLYRP3                     | 1.73E-02 | 0.11 | BRCA |
| chr1<br>6 | 31214<br>417  | - | cg12100791 | PYCARD;PYCA<br>RD           | 1.45E-03 | 0.11 | BRCA |
| chr1<br>0 | 17171<br>695  | - | cg10707565 | CUBN                        | 2.27E-03 | 0.11 | BRCA |
| chr4      | 16900<br>199  | - | cg08899626 | LDB2;LDB2;LD<br>B2;LDB2     | 4.64E-03 | 0.11 | BRCA |
| chr4      | 68324<br>0    | + | cg17952262 | MFSD7                       | 9.54E-05 | 0.12 | BRCA |

|      |               |   |            |                                                                 |          |      |      |
|------|---------------|---|------------|-----------------------------------------------------------------|----------|------|------|
| chr3 | 18656<br>0617 | - | cg03573747 | ADIPOQ                                                          | 4.38E-05 | 0.12 | BRCA |
| chr1 | 33160<br>791  | - | cg05342835 | SYNC;SYNC                                                       | 6.32E-11 | 0.12 | BRCA |
| chr1 | 10416<br>0257 | + | cg22215192 | AMY2A                                                           | 4.85E-06 | 0.12 | BRCA |
| chr3 | 86937<br>06   | + | cg22959932 | C3orf32;C3orf3<br>2                                             | 2.16E-05 | 0.12 | BRCA |
| chr3 | 58523<br>313  | + | cg13705284 | ACOX2                                                           | 1.80E-08 | 0.12 | BRCA |
| chr6 | 16727<br>5395 | - | cg13217373 | RPS6KA2                                                         | 7.81E-07 | 0.12 | BRCA |
| chr8 | 64205<br>06   | - | cg24670715 | ANGPT2;ANGP<br>T2;ANGPT2;AN<br>GPT2;ANGPT2;<br>ANGPT2;MCPH<br>1 | 5.15E-05 | 0.12 | BRCA |
| chr2 | 39928<br>0631 | - | cg22294908 | ZHX3;ZHX3                                                       | 1.16E-02 | 0.12 | BRCA |
| chr1 | 20631<br>7403 | + | cg21478437 | CTSE;CTSE                                                       | 1.23E-04 | 0.12 | BRCA |
| chr5 | 14058<br>8299 | + | cg07899016 | PCDHB12;PCD<br>HB12                                             | 7.69E-04 | 0.12 | BRCA |
| chr1 | 11867<br>308  | - | cg14472778 | CLCN6;CLCN6;<br>CLCN6;CLCN6;<br>MTHFR                           | 1.48E-05 | 0.12 | BRCA |
| chr9 | 10424<br>8926 | + | cg06912252 | C9orf125                                                        | 5.46E-03 | 0.12 | BRCA |
| chr1 | 36004<br>761  | + | cg13246592 | P2RX5;P2RX5;<br>P2RX5                                           | 3.48E-04 | 0.12 | BRCA |
| chr1 | 57148<br>215  | - | cg24459209 | PRG3                                                            | 1.20E-05 | 0.12 | BRCA |
| chr1 | 80946<br>079  | + | cg04765277 | FLJ45983;FLJ4<br>5983                                           | 3.33E-03 | 0.12 | BRCA |
| chr1 | 49449<br>2136 | + | cg13007988 | MLL2                                                            | 1.71E-03 | 0.12 | BRCA |
| chr1 | 11463<br>2844 | + | cg22692158 | PRB4                                                            | 4.19E-06 | 0.12 | BRCA |
| chr7 | 11405<br>5419 | + | cg05232889 | FOXP2;FOXP2;<br>FOXP2                                           | 4.55E-04 | 0.12 | BRCA |
| chr6 | 30659<br>643  | + | cg16979445 | NRM                                                             | 1.62E-03 | 0.12 | BRCA |
| chr1 | 64624<br>152  | + | cg11547724 | HPX                                                             | 8.66E-07 | 0.12 | BRCA |
| chr6 | 16672<br>2773 | + | cg05089968 | PRR18                                                           | 2.93E-05 | 0.12 | BRCA |
| chr5 | 95467<br>55   | - | cg03702236 | SEMA5A                                                          | 7.33E-06 | 0.12 | BRCA |
| chr1 | 21525<br>2662 | - | cg15583072 | SLCO1A2;IAPP                                                    | 9.54E-05 | 0.12 | BRCA |
| chr1 | 18362<br>2007 | - | cg20579480 | APOBEC4;RGL<br>1                                                | 1.46E-05 | 0.12 | BRCA |
| chr1 | 23653<br>4098 | + | cg27035169 | SLC7A8                                                          | 1.30E-11 | 0.12 | BRCA |

|           |               |   |            |                                         |          |      |      |
|-----------|---------------|---|------------|-----------------------------------------|----------|------|------|
| chr1<br>1 | 63272<br>554  | + | cg11484576 | LGALS12;LGALS12;LGALS12                 | 1.93E-06 | 0.13 | BRCA |
| chr7      | 87855<br>714  | + | cg02399455 | SRI                                     | 1.45E-03 | 0.13 | BRCA |
| chr2<br>0 | 58507<br>171  | + | cg07347645 | SYCP2;SYCP2                             | 2.87E-02 | 0.13 | BRCA |
| chr1      | 29852<br>18   | + | cg08528984 | FLJ42875;PRDM16;PRDM16;FLJ42875         | 8.57E-03 | 0.13 | BRCA |
| chr1<br>7 | 48546<br>118  | - | cg06958829 | ACSF2;CHAD                              | 2.60E-08 | 0.13 | BRCA |
| chr8      | 14412<br>0106 | - | cg07770222 | C8orf31                                 | 1.52E-03 | 0.13 | BRCA |
| chr1<br>2 | 53208<br>762  | + | cg12610744 | KRT4                                    | 5.06E-06 | 0.13 | BRCA |
| chr2      | 16734<br>3774 | + | cg05331214 | SCN7A                                   | 3.49E-03 | 0.13 | BRCA |
| chr1      | 15516<br>1784 | - | cg24512973 | MUC1;MUC1;MUC1;MUC1;MUC1;MUC1           | 5.45E-09 | 0.13 | BRCA |
| chr2      | 12122<br>3909 | - | cg17204557 | LOC84931                                | 1.06E-07 | 0.13 | BRCA |
| chr8      | 13205<br>4555 | - | cg13912117 |                                         | 8.58E-03 | 0.13 | BRCA |
| chr1      | 19723<br>8398 | + | cg00321478 | CRB1                                    | 1.55E-04 | 0.13 | BRCA |
| chr2<br>2 | 42896<br>688  | + | cg12078929 | SERHL                                   | 4.76E-07 | 0.13 | BRCA |
| chr1<br>7 | 79424<br>06   | - | cg15799267 | ALOX15B;ALOX15B;ALOX15B;ALOX15B;ALOX15B | 7.56E-04 | 0.13 | BRCA |
| chr2<br>0 | 58533<br>443  | + | cg20895028 | CDH26                                   | 1.88E-04 | 0.13 | BRCA |
| chr2      | 22028<br>3175 | + | cg18182399 | DES;DES                                 | 7.15E-05 | 0.13 | BRCA |
| chr3      | 11395<br>7903 | - | cg03109316 | ZNF80                                   | 1.83E-02 | 0.13 | BRCA |
| chr2      | 11969<br>9682 | - | cg11009736 | MARCO                                   | 1.67E-05 | 0.14 | BRCA |
| chr1      | 20703<br>9302 | - | cg23282674 | IL20                                    | 2.02E-04 | 0.14 | BRCA |
| chr5      | 95769<br>008  | + | cg23187653 | PCSK1                                   | 8.52E-04 | 0.14 | BRCA |
| chr1<br>0 | 10892<br>3781 | - | cg16415058 | SORCS1;SORCS1                           | 8.75E-08 | 0.14 | BRCA |
| chr2      | 18373<br>1407 | + | cg20308679 | FRZB;FRZB                               | 8.79E-06 | 0.14 | BRCA |
| chr1      | 20161<br>7042 | + | cg25167447 | NAV1                                    | 9.82E-08 | 0.14 | BRCA |
| chr1<br>7 | 48637<br>104  | - | cg05942574 | CACNA1G;CACNA1G;CACNA1G;CACNA1G;CACNA1G | 8.28E-05 | 0.14 | BRCA |



|      |                   |   |            |                                                                                                     |          |      |      |
|------|-------------------|---|------------|-----------------------------------------------------------------------------------------------------|----------|------|------|
|      |                   |   |            | A1G;CACNA1G<br>;CACNA1G;CA<br>CNA1G;CACNA<br>1G;CACNA1G;<br>CACNA1G;CAC<br>NA1G;CACNA1<br>G;CACNA1G |          |      |      |
| chr1 | 22601<br>2913     | - | cg24928687 | EPHX1;EPHX1                                                                                         | 7.86E-04 | 0.14 | BRCA |
| chr2 | 58533<br>0<br>495 | - | cg24607535 | CDH26;CDH26                                                                                         | 1.57E-03 | 0.14 | BRCA |
| chr1 | 15052<br>9<br>824 | - | cg03544379 | OR7C2                                                                                               | 3.09E-03 | 0.14 | BRCA |
| chr1 | 16330<br>784      | - | cg24525573 | C1orf64;C1orf6<br>4                                                                                 | 9.69E-05 | 0.14 | BRCA |
| chr1 | 99177<br>4<br>777 | - | cg06906435 | C14orf177                                                                                           | 6.04E-03 | 0.15 | BRCA |
| chr1 | 80946<br>0<br>41  | - | cg00779924 | FLJ45983;FLJ4<br>5983                                                                               | 1.96E-03 | 0.15 | BRCA |
| chr1 | 33795<br>7<br>67  | + | cg02228185 | ASPA;ASPA                                                                                           | 9.39E-07 | 0.15 | BRCA |
| chr1 | 15301<br>3830     | - | cg14826683 | SPRR2D                                                                                              | 1.13E-03 | 0.15 | BRCA |
| chr1 | 91124<br>1<br>71  | - | cg01081263 | SCUBE2;SCUB<br>E2                                                                                   | 4.06E-09 | 0.15 | BRCA |
| chr1 | 26223<br>0<br>310 | - | cg23771603 | MYO3A                                                                                               | 6.06E-03 | 0.15 | BRCA |
| chr1 | 52391<br>9<br>250 | + | cg16731240 | ZNF577;ZNF57<br>7;ZNF577                                                                            | 1.87E-06 | 0.15 | BRCA |
| chr3 | 19531<br>0883     | - | cg05624196 | APOD;APOD                                                                                           | 2.39E-05 | 0.16 | BRCA |
| chr5 | 13707<br>1523     | + | cg13847070 | KLHL3;KLHL3                                                                                         | 3.06E-05 | 0.16 | BRCA |
| chr1 | 18494<br>4288     | - | cg25182523 | FAM129A                                                                                             | 1.94E-07 | 0.16 | BRCA |
| chr1 | 26743<br>1<br>425 | + | cg05953243 | SLC5A12;SLC5<br>A12                                                                                 | 4.59E-04 | 0.16 | BRCA |
| chr7 | 86973<br>677      | - | cg15350036 | CROT;CROT;C<br>ROT;TP53TG1                                                                          | 5.74E-06 | 0.16 | BRCA |
| chr6 | 56112<br>291      | - | cg13830624 | COL21A1;COL<br>21A1                                                                                 | 2.35E-02 | 0.16 | BRCA |
| chr1 | 20305<br>8954     | - | cg11719784 |                                                                                                     | 2.99E-04 | 0.17 | BRCA |
| chr1 | 55400<br>8<br>167 | - | cg18085435 | ATP8B1                                                                                              | 4.21E-05 | 0.17 | BRCA |
| chr1 | 38615<br>2<br>67  | + | cg17904739 | EFCAB4B;EFC<br>AB4B;EFCAB4<br>B                                                                     | 1.03E-09 | 0.17 | BRCA |
| chr4 | 76555<br>547      | - | cg14988503 | CDKL2;CDKL2                                                                                         | 3.41E-02 | 0.17 | BRCA |
| chr3 | 18409<br>5505     | + | cg11819637 | THPO                                                                                                | 6.77E-07 | 0.17 | BRCA |

|           |               |   |            |                               |          |       |      |
|-----------|---------------|---|------------|-------------------------------|----------|-------|------|
| chr1<br>5 | 45803<br>341  | + | cg08057475 | SLC30A4;C15orf21              | 5.84E-04 | 0.17  | BRCA |
| chr2      | 15728<br>0411 | - | cg24579667 |                               | 4.93E-05 | 0.18  | BRCA |
| chr1      | 17301<br>9720 | - | cg19589427 | TNFSF18                       | 3.09E-06 | 0.18  | BRCA |
| chr1<br>7 | 48546<br>620  | - | cg06818777 | CHAD;ACSF2                    | 5.86E-07 | 0.18  | BRCA |
| chr1<br>1 | 26744<br>467  | - | cg20092728 | SLC5A12                       | 5.91E-03 | 0.18  | BRCA |
| chr1<br>8 | 70535<br>925  | + | cg21922574 | NETO1                         | 2.66E-06 | 0.18  | BRCA |
| chr6      | 50786<br>670  | + | cg25593948 | TFAP2B                        | 1.99E-04 | 0.18  | BRCA |
| chr5      | 13944<br>491  | - | cg03503295 | DNAH5                         | 8.39E-06 | 0.18  | BRCA |
| chr1<br>6 | 56672<br>415  | - | cg09137696 | MT1A                          | 1.20E-03 | 0.19  | BRCA |
| chr4      | 14117<br>8469 | + | cg04457051 | SCOC;SCOC                     | 3.04E-10 | 0.19  | BRCA |
| chr1<br>2 | 11062<br>035  | - | cg08658594 | TAS2R13;TAS2R13;PRR4;PRH1     | 7.08E-08 | 0.19  | BRCA |
| chr6      | 13736<br>6322 | + | cg22487322 | IL20RA                        | 4.97E-16 | 0.20  | BRCA |
| chr1<br>6 | 28674<br>34   | - | cg22730830 | PRSS21;PRSS21;PRSS21          | 2.26E-19 | 0.21  | BRCA |
| chr1      | 20332<br>0386 | - | cg26987645 | FMOD                          | 8.72E-14 | 0.22  | BRCA |
| chr1<br>2 | 64837<br>39   | - | cg18738906 | SCNN1A;SCNN1A;SCNN1A          | 9.84E-06 | 0.23  | BRCA |
| chr1<br>7 | 49295<br>615  | - | cg02880679 | MBTD1                         | 3.04E-06 | 0.23  | BRCA |
| chr1      | 24802<br>0812 | - | cg07533148 | TRIM58                        | 1.24E-04 | 0.27  | BRCA |
| chr1      | 16825<br>0628 | + | cg17095936 | TBX19                         | 9.72E-08 | 0.35  | BRCA |
| chr1<br>0 | 13504<br>4114 | + | cg09053680 | UTF1                          | 0.03     | -0.48 | UCEC |
| chr6      | 73332<br>073  | - | cg24687051 | KCNQ5;KCNQ5;KCNQ5;KCNQ5;KCNQ5 | 0.00     | -0.48 | UCEC |
| chr2      | 68546<br>507  | - | cg07080358 | CNRIP1;CNRIP1                 | 0.01     | -0.45 | UCEC |
| chr1<br>1 | 20690<br>957  | + | cg17371081 | NELL1;NELL1                   | 0.01     | -0.43 | UCEC |
| chr1<br>8 | 55438<br>01   | + | cg00027083 | EPB41L3                       | 0.03     | -0.39 | UCEC |
| chr1<br>8 | 49866<br>548  | + | cg21669679 | DCC;DCC                       | 0.01     | -0.36 | UCEC |
| chr4      | 16587<br>8091 | - | cg00393585 | C4orf39;TRIM61                | 0.01     | -0.35 | UCEC |
| chr1<br>2 | 85306<br>916  | + | cg03064067 | SLC6A15;SLC6A15;SLC6A15       | 0.00     | -0.34 | UCEC |

|           |               |   |            |                                                                                 |      |       |      |
|-----------|---------------|---|------------|---------------------------------------------------------------------------------|------|-------|------|
| chr1<br>4 | 38677<br>218  | + | cg27590397 | SSTR1;SSTR1                                                                     | 0.01 | -0.33 | UCEC |
| chr1<br>8 | 74962<br>369  | + | cg04534765 | GALR1;GALR1                                                                     | 0.02 | -0.32 | UCEC |
| chr1<br>8 | 74961<br>787  | + | cg10486998 | GALR1                                                                           | 0.03 | -0.32 | UCEC |
| chr1<br>4 | 27066<br>634  | - | cg18488855 | NOVA1;NOVA1<br>;NOVA1                                                           | 0.02 | -0.31 | UCEC |
| chr5      | 16097<br>5024 | + | cg01939681 | GABRB2;GABR<br>B2                                                               | 0.01 | -0.31 | UCEC |
| chr1<br>9 | 29011<br>47   | - | cg08634464 | ZNF57                                                                           | 0.00 | -0.30 | UCEC |
| chr1<br>0 | 17796<br>67   | + | cg05307923 | ADARB2;ADAR<br>B2                                                               | 0.01 | -0.30 | UCEC |
| chr1<br>6 | 85932<br>853  | - | cg24826867 | IRF8                                                                            | 0.02 | -0.30 | UCEC |
| chr1<br>8 | 74961<br>785  | + | cg15343119 | GALR1                                                                           | 0.03 | -0.30 | UCEC |
| chr2      | 21022<br>565  | - | cg09109450 | C2orf43                                                                         | 0.00 | -0.28 | UCEC |
| chr1<br>8 | 63417<br>392  | + | cg04564030 | CDH7;CDH7                                                                       | 0.04 | -0.28 | UCEC |
| chr4      | 66535<br>145  | + | cg18420965 | EPHA5;EPHA5                                                                     | 0.01 | -0.26 | UCEC |
| chr1<br>9 | 46477<br>338  | + | cg21461100 | NOVA2                                                                           | 0.01 | -0.26 | UCEC |
| chr1<br>8 | 74961<br>727  | + | cg26721264 | GALR1                                                                           | 0.03 | -0.26 | UCEC |
| chr2<br>1 | 31312<br>091  | + | cg09542111 | GRIK1;GRIK1;<br>GRIK1;GRIK1                                                     | 0.02 | -0.26 | UCEC |
| chr2<br>0 | 53092<br>781  | + | cg11822659 | DOK5                                                                            | 0.01 | -0.25 | UCEC |
| chr2      | 45169<br>447  | + | cg13163729 | SIX3                                                                            | 0.01 | -0.25 | UCEC |
| chr1<br>1 | 13178<br>0332 | - | cg20881910 | NTM;NTM;NTM<br>;NTM                                                             | 0.02 | -0.25 | UCEC |
| chr1<br>2 | 85306<br>474  | - | cg14449051 | SLC6A15;SLC6<br>A15;SLC6A15;<br>SLC6A15;SLC6<br>A15;SLC6A15                     | 0.02 | -0.25 | UCEC |
| chr1<br>0 | 12807<br>6936 | + | cg11668923 | ADAM12;ADAM<br>12;ADAM12;AD<br>AM12                                             | 0.05 | -0.25 | UCEC |
| chr3      | 12045<br>459  | - | cg15873301 | SYN2;SYN2                                                                       | 0.01 | -0.24 | UCEC |
| chr6      | 73331<br>652  | + | cg15717808 | KCNQ5;KCNQ5<br>;KCNQ5;KCNQ<br>5;KCNQ5;KCN<br>Q5;KCNQ5;KC<br>NQ5;KCNQ5;K<br>CNQ5 | 0.01 | -0.24 | UCEC |
| chr1      | 53528<br>612  | - | cg23092823 | PODN                                                                            | 0.05 | -0.23 | UCEC |
| chr8      | 24815<br>006  | + | cg13266631 | NEFL                                                                            | 0.02 | -0.23 | UCEC |

|           |               |   |            |                                                                 |      |       |      |
|-----------|---------------|---|------------|-----------------------------------------------------------------|------|-------|------|
| chr5      | 45695<br>922  | - | cg06498267 | HCN1                                                            | 0.01 | -0.22 | UCEC |
| chr4      | 42285<br>71   | + | cg14882700 | OTOP1                                                           | 0.02 | -0.22 | UCEC |
| chr1      | 15890<br>1938 | + | cg19884600 | PYHIN1;PYHIN<br>1;PYHIN1;PYHI<br>N1                             | 0.03 | -0.22 | UCEC |
| chr7      | 75245<br>6    | + | cg13577076 | PRKAR1B;PRK<br>AR1B;PRKAR1<br>B;PRKAR1B;P<br>RKAR1B;PRKA<br>R1B | 0.01 | -0.22 | UCEC |
| chr1<br>8 | 31020<br>511  | - | cg05245861 | C18orf34;C18or<br>f34                                           | 0.02 | -0.21 | UCEC |
| chr2<br>1 | 31312<br>328  | - | cg21816539 | GRIK1;GRIK1                                                     | 0.01 | -0.21 | UCEC |
| chr8      | 73450<br>181  | + | cg20890210 | KCNB2                                                           | 0.04 | -0.21 | UCEC |
| chr1<br>0 | 12807<br>7323 | + | cg13488201 | ADAM12;ADAM<br>12                                               | 0.04 | -0.21 | UCEC |
| chr1<br>8 | 74961<br>424  | + | cg12699371 | GALR1                                                           | 0.03 | -0.21 | UCEC |
| chr1<br>6 | 10277<br>017  | + | cg25047001 | GRIN2A;GRIN2<br>A;GRIN2A                                        | 0.05 | -0.20 | UCEC |
| chr6      | 62996<br>697  | + | cg02217159 | KHDRBS2                                                         | 0.01 | -0.19 | UCEC |
| chr1<br>1 | 13178<br>0946 | - | cg11965370 | NTM;NTM;NTM<br>;NTM;NTM;NT<br>M;NTM                             | 0.01 | -0.19 | UCEC |
| chr3      | 21792<br>434  | + | cg18267381 | ZNF385D;ZNF3<br>85D                                             | 0.05 | -0.19 | UCEC |
| chr1      | 38230<br>769  | + | cg12128017 | EPHA10;EPHA<br>10;EPHA10;EP<br>HA10                             | 0.04 | -0.19 | UCEC |
| chr1<br>3 | 27334<br>259  | + | cg22179082 | GPR12                                                           | 0.04 | -0.19 | UCEC |
| chr1<br>0 | 10360<br>3722 | + | cg25123470 | KCNIP2;KCNIP<br>2;KCNIP2;KCN<br>IP2;KCNIP2;KC<br>NIP2           | 0.05 | -0.19 | UCEC |
| chrX      | 91034<br>003  | - | cg07474356 | PCDH11X                                                         | 0.02 | -0.19 | UCEC |
| chr1<br>0 | 10108<br>8930 | - | cg01968793 | CNNM1;CNNM<br>1                                                 | 0.01 | -0.19 | UCEC |
| chr1<br>8 | 74963<br>364  | - | cg00662556 | GALR1                                                           | 0.01 | -0.19 | UCEC |
| chr3      | 19190<br>202  | - | cg07657236 | KCNH8;KCNH8                                                     | 0.05 | -0.18 | UCEC |
| chr2      | 19305<br>9405 | + | cg06856528 | TMEFF2;TMEF<br>F2                                               | 0.01 | -0.18 | UCEC |
| chr1<br>8 | 49868<br>101  | + | cg25602457 | DCC                                                             | 0.04 | -0.18 | UCEC |
| chr2<br>0 | 59826<br>207  | - | cg15534366 | CDH4                                                            | 0.00 | -0.18 | UCEC |
| chr1      | 24802         | + | cg20855565 | TRIM58                                                          | 0.02 | -0.18 | UCEC |

|           |               |   |            |                                                   |      |       |      |
|-----------|---------------|---|------------|---------------------------------------------------|------|-------|------|
|           | 0350          |   |            |                                                   |      |       |      |
| chr5      | 15178<br>4441 | + | cg03914397 | NMUR2                                             | 0.04 | -0.18 | UCEC |
| chr1<br>9 | 44905<br>343  | - | cg09030119 | ZNF285A                                           | 0.02 | -0.18 | UCEC |
| chr1<br>9 | 50831<br>901  | - | cg06572160 | KCNC3                                             | 0.04 | -0.18 | UCEC |
| chr2      | 11960<br>6055 | - | cg03266453 | EN1                                               | 0.05 | -0.18 | UCEC |
| chr8      | 13205<br>4555 | - | cg13912117 |                                                   | 0.02 | -0.17 | UCEC |
| chr3      | 16491<br>4437 | - | cg13619915 | SLITRK3;SLITR<br>K3                               | 0.01 | -0.17 | UCEC |
| chr8      | 13916<br>4635 | + | cg06276653 | FAM135B                                           | 0.01 | -0.17 | UCEC |
| chr7      | 86273<br>429  | - | cg14724613 | GRM3;GRM3                                         | 0.04 | -0.17 | UCEC |
| chr1<br>5 | 35046<br>760  | + | cg21053529 | GJD2                                              | 0.02 | -0.17 | UCEC |
| chr1<br>7 | 80186<br>273  | - | cg14417329 | SLC16A3;SLC1<br>6A3                               | 0.00 | -0.17 | UCEC |
| chrX      | 55478<br>180  | + | cg18869368 | MAGEH1                                            | 0.03 | -0.17 | UCEC |
| chr1<br>1 | 13340<br>2230 | + | cg03923934 | OPCML;OPCM<br>L                                   | 0.03 | -0.17 | UCEC |
| chr3      | 66550<br>735  | + | cg26131019 | LRIG1                                             | 0.00 | -0.17 | UCEC |
| chr1<br>3 | 84456<br>127  | - | cg07104706 | SLITRK1;SLITR<br>K1                               | 0.01 | -0.17 | UCEC |
| chr1<br>8 | 74964<br>030  | - | cg05896682 | GALR1                                             | 0.02 | -0.16 | UCEC |
| chr3      | 62359<br>420  | + | cg06423920 | FEZF2                                             | 0.01 | -0.16 | UCEC |
| chr9      | 10450<br>0729 | - | cg08997253 | GRIN3A;GRIN3<br>A                                 | 0.00 | -0.16 | UCEC |
| chr1      | 35672<br>14   | - | cg19135761 | WDR8                                              | 0.05 | -0.16 | UCEC |
| chr7      | 76038<br>785  | - | cg13594711 | SRCRB4D;SRC<br>RB4D;ZP3                           | 0.02 | -0.16 | UCEC |
| chr1<br>9 | 44905<br>882  | - | cg26918645 | ZNF285A                                           | 0.05 | -0.16 | UCEC |
| chr2      | 22904<br>6325 | - | cg04072323 | SPHKAP;SPHK<br>AP;SPHKAP;S<br>PHKAP               | 0.01 | -0.16 | UCEC |
| chr1<br>1 | 59855<br>616  | - | cg22197708 | MS4A2;MS4A2                                       | 0.01 | -0.16 | UCEC |
| chr3      | 16491<br>4471 | - | cg14717170 | SLITRK3                                           | 0.02 | -0.15 | UCEC |
| chr1<br>1 | 21615<br>86   | - | cg25163476 | INS-<br>IGF2;IGF2;IGF2<br>AS;IGF2;IGF2A<br>S;IGF2 | 0.05 | -0.15 | UCEC |
| chr1      | 23720<br>5098 | + | cg19764418 | RYR2                                              | 0.01 | -0.15 | UCEC |

|           |               |   |            |                                       |      |       |      |
|-----------|---------------|---|------------|---------------------------------------|------|-------|------|
| chr1      | 20622<br>3241 | + | cg18992688 | AVPR1B                                | 0.00 | -0.15 | UCEC |
| chr1<br>9 | 56510<br>892  | - | cg05023116 | NLRP5                                 | 0.03 | -0.15 | UCEC |
| chr1<br>1 | 10548<br>1509 | + | cg19343464 | GRIA4;GRIA4;<br>GRIA4;GRIA4;<br>GRIA4 | 0.01 | -0.15 | UCEC |
| chr4      | 90757<br>533  | + | cg26578617 | SNCA;SNCA;S<br>NCA;SNCA               | 0.05 | -0.15 | UCEC |
| chrX      | 14099<br>1592 | + | cg25651984 | MAGEC1                                | 0.01 | -0.15 | UCEC |
| chr4      | 15612<br>9725 | - | cg27504805 | NPY2R                                 | 0.04 | -0.15 | UCEC |
| chr2      | 11037<br>3002 | + | cg03552103 | SEPT10;SEPT1<br>0;ANKRD57             | 0.01 | -0.15 | UCEC |
| chr9      | 10450<br>1030 | + | cg18794577 | GRIN3A                                | 0.01 | -0.14 | UCEC |
| chr1      | 23685<br>0232 | - | cg21376883 | ACTN2                                 | 0.04 | -0.14 | UCEC |
| chr1<br>2 | 51532<br>88   | + | cg20792062 | KCNA5;KCNA5                           | 0.01 | -0.14 | UCEC |
| chr1<br>0 | 26223<br>100  | + | cg08441170 | MYO3A;MYO3<br>A                       | 0.00 | -0.14 | UCEC |
| chr9      | 12213<br>2261 | + | cg25935911 | DBC1                                  | 0.01 | -0.14 | UCEC |
| chr1<br>0 | 50817<br>306  | + | cg18592174 | SLC18A3;CHA<br>T                      | 0.02 | -0.14 | UCEC |
| chr1<br>3 | 70682<br>324  | - | cg20523861 | KLHL1;KLHL1;<br>ATXN8OS               | 0.03 | -0.14 | UCEC |
| chr1      | 35220<br>814  | - | cg01333788 | GJB5                                  | 0.00 | -0.14 | UCEC |
| chr1<br>8 | 44336<br>399  | - | cg19751300 | ST8SIA5                               | 0.04 | -0.13 | UCEC |
| chr1<br>9 | 41195<br>910  | + | cg08450982 | NUMBL                                 | 0.02 | -0.13 | UCEC |
| chr1<br>9 | 31770<br>476  | - | cg08458170 | TSHZ3                                 | 0.01 | -0.13 | UCEC |
| chr1<br>0 | 12969<br>1429 | + | cg23817637 | CLRN3                                 | 0.02 | -0.13 | UCEC |
| chr1<br>7 | 79060<br>98   | - | cg25465406 | GUCY2D                                | 0.05 | -0.13 | UCEC |
| chrX      | 85303<br>309  | - | cg25488547 | CHM;CHM                               | 0.02 | -0.13 | UCEC |
| chr1<br>1 | 11334<br>6327 | + | cg12758687 | DRD2;DRD2                             | 0.05 | -0.13 | UCEC |
| chr6      | 78173<br>250  | - | cg08614481 | HTR1B                                 | 0.02 | -0.13 | UCEC |
| chr7      | 30833<br>38   | + | cg26937500 | CARD11;CARD<br>11                     | 0.01 | -0.12 | UCEC |
| chr1      | 66258<br>441  | - | cg26832142 | PDE4B;PDE4B                           | 0.00 | -0.12 | UCEC |
| chr4      | 14755<br>9579 | - | cg13262687 | POU4F2                                | 0.03 | -0.12 | UCEC |
| chr7      | 13013<br>1258 | + | cg13917504 | MEST;MEST;M<br>EST;MESTIT1;           | 0.03 | -0.12 | UCEC |

|           |               |   |            | MEST                                                                            |      |       |      |
|-----------|---------------|---|------------|---------------------------------------------------------------------------------|------|-------|------|
| chr3      | 45092<br>68   | - | cg18847227 | SUMF1;SUMF1<br>;SUMF1                                                           | 0.02 | -0.12 | UCEC |
| chr1      | 37499<br>309  | + | cg06722633 | GRIK3                                                                           | 0.04 | -0.12 | UCEC |
| chr1<br>8 | 56887<br>785  | - | cg23357981 | GRP;GRP;GRP                                                                     | 0.04 | -0.12 | UCEC |
| chrX      | 14489<br>9412 | - | cg27584469 | SLITRK2;SLITR<br>K2;SLITRK2;SL<br>ITRK2;SLITRK2<br>;SLITRK2;SLIT<br>RK2;SLITRK2 | 0.02 | -0.12 | UCEC |
| chr1<br>9 | 57349<br>815  | + | cg19771589 | PEG3;PEG3;ZI<br>M2;PEG3;PEG<br>3;ZIM2;ZIM2                                      | 0.02 | -0.12 | UCEC |
| chr2<br>0 | 30225<br>517  | - | cg27413508 | COX4I2                                                                          | 0.02 | -0.12 | UCEC |
| chr6      | 13356<br>1932 | - | cg20330472 | EYA4;EYA4;EY<br>A4                                                              | 0.00 | -0.12 | UCEC |
| chr8      | 32405<br>427  | - | cg19162158 | NRG1;NRG1;N<br>RG1;NRG1;NR<br>G1;NRG1;NRG<br>1;NRG1;NRG1;<br>NRG1;NRG1;N<br>RG1 | 0.02 | -0.11 | UCEC |
| chr2      | 46523<br>461  | - | cg17518825 | EPAS1                                                                           | 0.00 | -0.11 | UCEC |
| chr1<br>2 | 45542<br>95   | - | cg01731341 | FGF6                                                                            | 0.03 | -0.11 | UCEC |
| chr5      | 14448<br>78   | + | cg26205131 | SLC6A3                                                                          | 0.01 | -0.11 | UCEC |
| chr7      | 49813<br>763  | - | cg00333226 | VWC2                                                                            | 0.05 | -0.11 | UCEC |
| chr1<br>0 | 26223<br>310  | - | cg23771603 | MYO3A                                                                           | 0.01 | -0.11 | UCEC |
| chr5      | 44389<br>282  | + | cg20387341 | FGF10                                                                           | 0.04 | -0.11 | UCEC |
| chrX      | 75647<br>859  | - | cg04544498 | MAGEE1                                                                          | 0.02 | -0.11 | UCEC |
| chr1<br>7 | 39867<br>328  | + | cg12229387 | GAST                                                                            | 0.00 | -0.11 | UCEC |
| chr2      | 73520<br>043  | - | cg13481359 | EGR4                                                                            | 0.03 | -0.11 | UCEC |
| chr2      | 23900<br>9036 | - | cg09039163 | ESPNL;ESPNL                                                                     | 0.00 | -0.10 | UCEC |
| chr1<br>4 | 24804<br>022  | + | cg12265829 | ADCY4                                                                           | 0.02 | -0.10 | UCEC |
| chr6      | 11130<br>2729 | - | cg05213296 | RPF2                                                                            | 0.01 | -0.10 | UCEC |
| chr1<br>9 | 42800<br>54   | - | cg18581445 | SHD;SHD                                                                         | 0.01 | -0.10 | UCEC |
| chr1<br>6 | 71264<br>290  | - | cg20977864 | HYDIN;HYDIN                                                                     | 0.05 | -0.10 | UCEC |
| chr9      | 13070<br>0866 | - | cg23006204 | DPM2                                                                            | 0.03 | -0.10 | UCEC |

|      |       |   |            |                         |          |       |      |  |
|------|-------|---|------------|-------------------------|----------|-------|------|--|
| chr1 | 20173 |   |            |                         |          |       |      |  |
| 1    | 62    | + | cg22172494 | H19                     | 0.01     | 0.10  | UCEC |  |
| chr1 | 67137 |   |            |                         |          |       |      |  |
| 7    | 953   | - | cg22081096 | ABCA6;ABCA6             | 0.02     | 0.10  | UCEC |  |
| chr9 | 13096 |   |            |                         |          |       |      |  |
|      | 8072  | + | cg05826823 | CIZ1;DNM1;DNM1;CIZ1     | 0.02     | 0.11  | UCEC |  |
| chr5 | 85110 |   |            |                         |          |       |      |  |
|      | 1     | + | cg18429742 | ZDHHC11                 | 0.01     | 0.11  | UCEC |  |
| chr1 | 20187 |   |            |                         |          |       |      |  |
| 1    | 24    | + | cg07342901 | H19;MIR675              | 0.02     | 0.11  | UCEC |  |
| chr4 | 26493 |   |            |                         |          |       |      |  |
|      | 496   | - | cg04353483 | CCKAR                   | 0.04     | 0.11  | UCEC |  |
| chr9 | 13993 |   |            |                         |          |       |      |  |
|      | 9792  | + | cg26581729 | NPDC1                   | 0.05     | 0.11  | UCEC |  |
| chr6 | 15295 |   |            |                         |          |       |      |  |
|      | 8899  | - | cg27316956 | SYNE1;SYNE1             | 0.00     | 0.11  | UCEC |  |
| chr1 | 42092 |   |            |                         |          |       |      |  |
| 7    | 431   | + | cg12259256 | TMEM101                 | 0.02     | 0.11  | UCEC |  |
| chr2 | 37216 |   |            |                         |          |       |      |  |
| 2    | 067   | + | cg02978737 | PVALB                   | 0.01     | 0.12  | UCEC |  |
| chr1 | 20176 |   |            |                         |          |       |      |  |
| 1    | 64    | - | cg25852472 | H19                     | 0.02     | 0.12  | UCEC |  |
| chr2 | 38201 |   |            |                         |          |       |      |  |
| 2    | 690   | + | cg07141002 | H1F0                    | 0.05     | 0.12  | UCEC |  |
| chr2 | 22028 |   |            |                         |          |       |      |  |
|      | 3175  | + | cg18182399 | DES;DES                 | 0.01     | 0.13  | UCEC |  |
| chr1 | 34345 |   |            |                         |          |       |      |  |
| 7    | 136   | + | cg14916288 | CCL23;CCL23             | 0.02     | 0.13  | UCEC |  |
| chr1 | 80600 |   |            |                         |          |       |      |  |
| 1    | 60    | - | cg15480475 | TUB                     | 0.01     | 0.13  | UCEC |  |
| chr1 | 38615 |   |            |                         |          |       |      |  |
| 2    | 67    | + | cg17904739 | EFCAB4B;EFCAB4B;EFCAB4B | 0.01     | 0.13  | UCEC |  |
| chr8 | 11814 |   |            |                         |          |       |      |  |
|      | 6418  | - | cg23338195 | SLC30A8                 | 0.03     | 0.16  | UCEC |  |
| chr2 | 33957 |   |            |                         |          |       |      |  |
| 1    | 290   | + | cg20857253 | TCP10L                  | 0.03     | 0.17  | UCEC |  |
| chr1 | 20174 |   |            |                         |          |       |      |  |
| 1    | 83    | - | cg26808784 | H19                     | 0.00     | 0.19  | UCEC |  |
| chrX | 28821 |   |            |                         |          |       |      |  |
|      | 83    | + | cg22376897 | ARSE                    | 0.00     | 0.24  | UCEC |  |
| chrX | 28823 |   |            |                         |          |       |      |  |
|      | 33    | + | cg11964613 | ARSE;ARSE               | 0.00     | 0.25  | UCEC |  |
| chr3 | 12316 |   |            |                         |          |       |      |  |
|      | 7276  | - | cg13878010 | ADCY5                   | 0.01     | 0.29  | UCEC |  |
| chr3 | 66550 |   |            |                         |          |       |      |  |
|      | 735   | + | cg26131019 | LRIG1                   | 5.74E-14 | -0.23 | CESC |  |
| chr2 | 46523 |   |            |                         |          |       |      |  |
|      | 461   | - | cg17518825 | EPAS1                   | 0.005    | -0.15 | CESC |  |

Chr: chromosome of probe-associated gene

Pos: Genomic base position

Strand: + or - strand identity

Name: DNA methylation probe name



UCSC RefGene Name

adj.P.Val: P value adjusted for multiple hypothesis testing with BH method

delta Beta: Difference in mean beta methylation level (EA – AA)

Tumor: CESC = cervix, UCEC = uterine endometrial carcinoma, OV = ovary, BRCA = breast
