# Supplementary material
Source: PubMed Central journal article supplement (PMC9973425)
Supplement: crc-21-0018-s07.pdf [file crc-21-0018-s07.pdf]

**Supplemental Table 7**

| <b>Name</b> | <b>Relation to Island</b> | <b>UCSC RefGene Name</b> | <b>UCSC RefGene Accession</b>              | <b>UCSC RefGene Group</b> | <b>Publication</b>         |
|-------------|---------------------------|--------------------------|--------------------------------------------|---------------------------|----------------------------|
| cg04601137  | N_Shore                   | ADAMTSL5                 | NM_213604                                  | 5'UTR                     | <i>Joubert et al 2016</i>  |
| cg17826679  | Island                    | SLC44A2;SLC44A2          | NM_020428;NM_001145056                     | TSS200;Body               | <i>Joubert et al 2016</i>  |
| cg13626881  | OpenSea                   |                          |                                            |                           | <i>Joubert et al 2016</i>  |
| cg23006204  | S_Shore                   | DPM2                     | NM_003863                                  | TSS200                    | <i>Joubert et al 2016</i>  |
| cg26799474  | OpenSea                   | CASP8;CASP8;CASP8        | NM_001080124;NM_033355;NM_033358;NM_001228 | 5'UTR;5'UTR;5'UTR;5'UTR   | <i>Joubert et al 2016</i>  |
| cg06144905  | OpenSea                   | PIPOX                    | NM_016518                                  | TSS200                    | <i>Joubert et al 2016</i>  |
| cg05232889  | OpenSea                   | FOXP2;FOXP2              | NM_148898;NM_148899;NM_014491              | 5'UTR;5'UTR;5'UTR         | <i>Jacobsen et al 2012</i> |
| cg27035169  | OpenSea                   | SLC7A8                   | NM_012244                                  | TSS1500                   | <i>Joubert et al 2016</i>  |
| cg05331214  | OpenSea                   | SCN7A                    | NM_002976                                  | TSS1500                   | <i>Joehanes et al 2016</i> |
| cg15873301  | N_Shore                   | SYN2;SYN2                | NM_133625;NM_003178                        | TSS1500;TSS1500           | <i>Galanter et al 2017</i> |
| cg08124030  | OpenSea                   | TM4SF1                   | NM_014220                                  | 1stExon                   | <i>Jacobsen et al 2012</i> |

Name: DNA methylation probe name

Relations to Island: position of methylation probe relative to nearest island

UCSC RefGene Name

UCSC RefGene Accession number

UCSC RefGeneGroup: Assigned DNA loci per UCSC designation

Publicaton: Publication associating probe with environmental stimuli
