# Supplementary material
Source: PubMed Central journal article supplement (PMC9973425)
Supplement: crc-21-0018-s10.pdf [file crc-21-0018-s10.pdf]

**Figure S3**

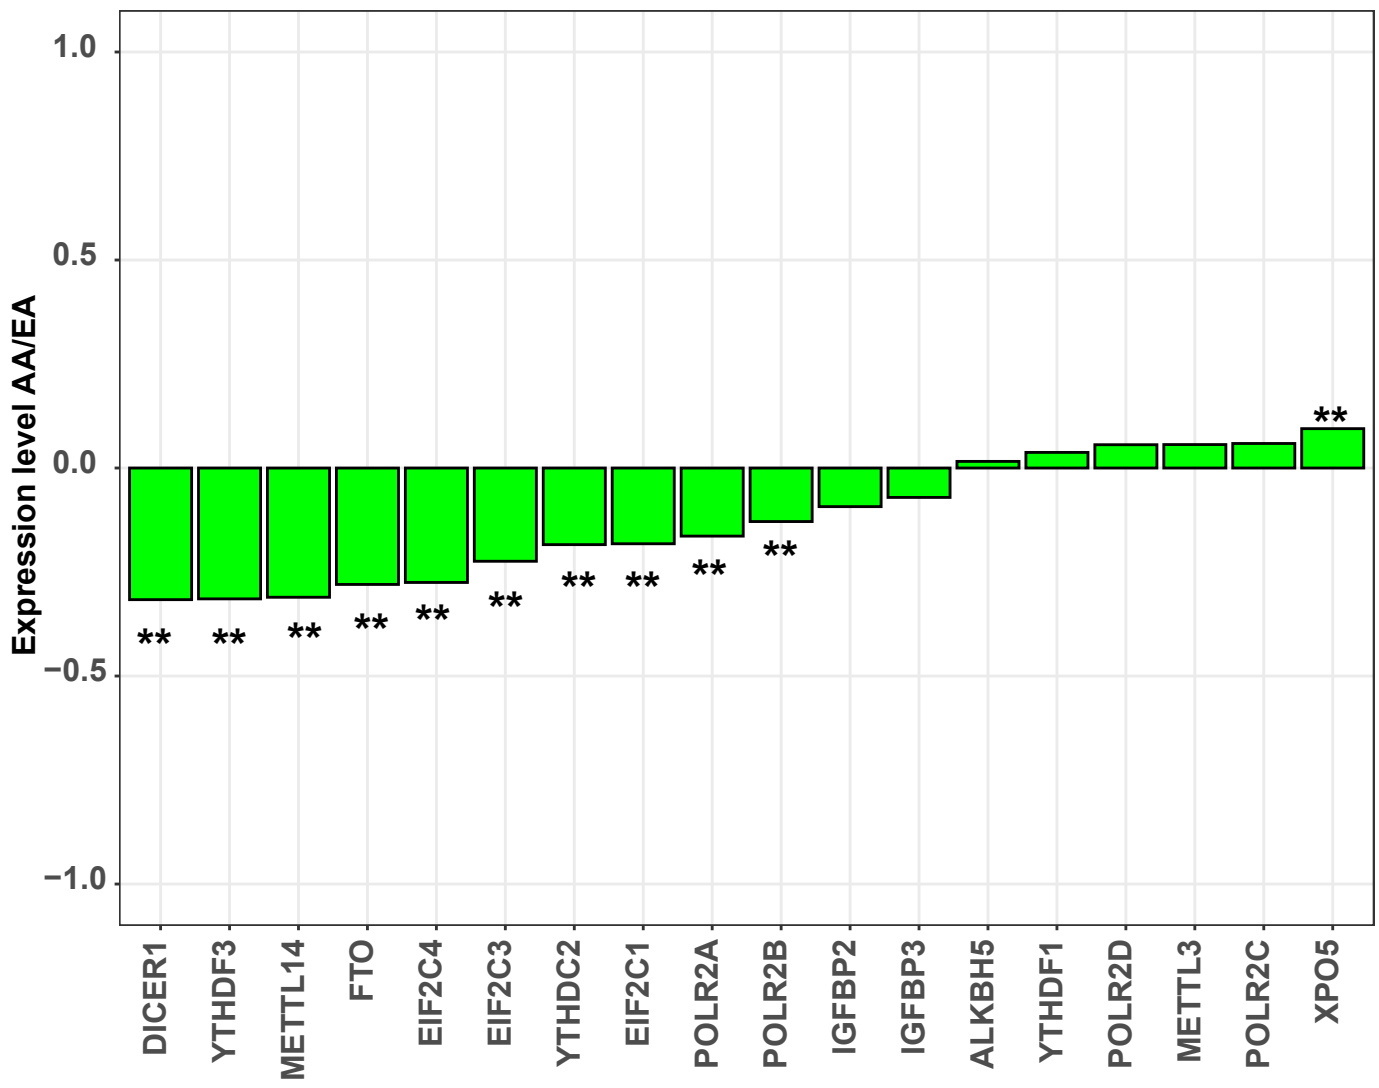

**Log2 transformed expression levels (RPKM) of RNA processing pathway members in African American (AA) vs. European American (EA) samples AA/EA. Transcripts with lower values in AA samples compared to EA samples have a negative log fold change value. Statistically significant t tests with adjusted P values less than 0.01 are indicated with double asterisks.**
