# Supplementary material
Source: PubMed Central journal article supplement (PMC9973425)
Supplement: crc-21-0018-s12.pdf [file crc-21-0018-s12.pdf]

# Figure S5

Location of probe relative to gene structure

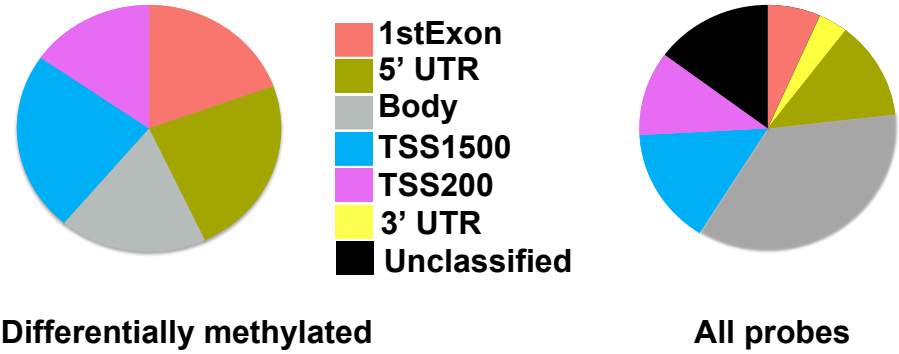

Pie charts showing location of probes with significant methylation changes in African American (AA) samples and locations of all probes relative to gene structure. UTR: untranslated region; TSS: transcription start site. TSS1500: 200 to -1500 nt upstream of TSS. TSS200 from TSS to -200 nt upstream of TSS. Relative to all probes this distribution is significantly different via Chi square test, p-value  $1.5 \times 10^{-12}$ .
